# Supplementary material for: A Critical Review of Naphthalene Sources and Exposures Relevant to Indoor and Outdoor Air
Source: MDPI journal article supplement (doi:10.3390/ijerph7072903), 2010-07-20
Supplement: s1 [file s1]

Article

## Urinary Concentrations of Dialkylphosphate Metabolites of Organophosphorus Pesticides: National Health and Nutrition Examination Survey 1999–2004

Dana Boyd Barr <sup>1,\*</sup>, Lee-Yang Wong <sup>2</sup>, Roberto Bravo <sup>2</sup>, Gayanga Weerasekera <sup>2</sup>,  
Martins Odetokun <sup>2</sup>, Paula Restrepo <sup>2</sup>, Do-Gyun Kim <sup>2</sup>, Carolina Fernandez <sup>2</sup>,  
Ralph D. Whitehead Jr. <sup>2</sup>, Jose Perez <sup>2</sup>, Maribel Gallegos <sup>2</sup>, Bryan L. Williams <sup>2</sup> and  
Larry L. Needham <sup>2,†</sup>

<sup>1</sup> Emory University, Rollins School of Public Health, 1518 Clifton Rd., Atlanta, GA 30322, USA

<sup>2</sup> Centers for Disease Control and Prevention, National Center for Environmental Health, 1600 Clifton Rd., Atlanta, GA 30333, USA; E-Mails: lee-yang.wong@cdc.hhs.gov (L.-Y.W.); roberto.bravo@cdc.hhs.gov (R.B.); martins.odetokun@cdc.hhs.gov (M.O.); paula.restrepo@cdc.hhs.gov (P.R.); do-gyun.kim@cdc.hhs.gov (D.-G.K.); carolina.fernandez@cdc.hhs.gov (C.F.); ralph.whitehead@cdc.hhs.gov (R.D.W.); jose.perez@cdc.hhs.gov (J.P.); maribel.gallegos@cdc.hhs.gov (M.G.); blwill9@emory.edu (B.L.W.)

\* Author to whom correspondence should be addressed; E-Mail: dbbarr@emory.edu; Tel.: +1-404-727-9605; Fax: +1-404-727-8744.

† Deceased on 23 October 2010.

*Received: 25 May 2011; in revised form: 29 June 2011 / Accepted: 8 July 2011 /*

*Published: 25 July 2011*

---

**Abstract:** Organophosphorus (OP) insecticides were among the first pesticides that EPA reevaluated as part of the Food Quality Protection Act of 1996. Our goal was to assess exposure to OP insecticides in the U.S. general population over a six-year period. We analyzed 7,456 urine samples collected as part of three two-year cycles of the National Health and Nutrition Examination Survey (NHANES) from 1999–2004. We measured six dialkylphosphate metabolites of OP pesticides to assess OP pesticide exposure. In NHANES 2003–2004, dimethylthiophosphate was detected most frequently with median and 95th percentile concentrations of 2.03 and 35.3 µg/L, respectively. Adolescents were two to three times more likely to have diethylphosphate concentrations above the 95th percentile estimate of 15.5 µg/L than adults and senior adults. Conversely, for

dimethyldithiophosphate, senior adults were 3.8 times and 1.8 times more likely to be above the 95th percentile than adults and adolescents, respectively, while adults were 2.1 times more likely to be above the 95th percentile than the adolescents. Our data indicate that the most vulnerable segments of our population—children and older adults—have higher exposures to OP pesticides than other population segments. However, according to DAP urinary metabolite data, exposures to OP pesticides have declined during the last six years at both the median and 95th percentile levels.

**Keywords:** NHANES; urine; organophosphorus; pesticide; dialkylphosphate

---

## **1. Introduction**

In 1999, an estimated 830 million pounds of pesticides were used in the United States [1]. Organophosphorus (OP) pesticides are among the most common in the United States and are applied in both agricultural and residential settings. Currently, 34 OP pesticides are registered with the U.S. Environmental Protection Agency (EPA) for use in the United States [2]. According to the EPA, 60 million pounds of OP pesticides were used on corn, cotton, other field crops such as canola and alfalfa, fruits, nuts, and vegetables in 1999 [1]. Because of their widespread use on food crops, the EPA established food tolerance levels to prevent hazardous exposures in the diet as mandated by the Federal Insecticide, Fungicide, and Rodenticide Act (FIFRA) [2].

The Food Quality Protection Act of 1996 (FQPA) [3] amended FIFRA to include cumulative and aggregate exposure risk assessments in derivative food tolerance levels. In addition, special consideration was to be given to exposures among children. Because of their common mode of toxicity as potent acetyl cholinesterase inhibitors, the EPA selected OP insecticides as the first class of pesticides for reassessing food tolerances. The reassessment of OP pesticides was completed in August 2006. The EPA estimated that residential use of OP pesticides decreased by 20 million pounds annually, largely because of the voluntary cancellation of post-construction residential registrations on chlorpyrifos and diazinon in 2000 and 2002 [2]. Although the phase-out approach to eliminating residential uses of chlorpyrifos and diazinon occurred over a several month period, some reports suggest that use of OP insecticides declined shortly after the announcement of the cancellations [4].

Many biomonitoring studies evaluating occupational [5-9], para-occupational [8,10-13], and background exposures [4,14-25] have focused on OP pesticides. Because exposure typically occurs by multiple routes and dominant routes of exposure vary, assessing exposure to OP pesticides is not a trivial process. In many epidemiologic studies, exposure markers in biological samples have been measured to estimate the absorbed dose [10,26-30]. One of the most common measures of OP pesticide exposure is quantifying six common urinary dialkylphosphate (DAP) metabolites. This measure provides no specific information about the pesticide to which a person was exposed and it may represent exposure to both the pesticide itself and its environmental degradate. However, urinary DAP metabolite measurements may provide useful information about cumulative exposure to OP pesticides as a class because about 75% of the EPA-registered OP pesticides form one to three of these six DAP metabolites.

We reported urinary DAP metabolite concentrations among 7,456 persons aged 6–59 years old from 1999–2000 and among persons aged six years and older from 2001–2004. Specifically, we reported urinary concentrations of dimethylphosphate (DMP), diethylphosphate (DEP), dimethylthiophosphate (DMTP), diethylthiophosphate (DETP), dimethyldithiophosphate (DMDTP), and diethyldithio-phosphate (DEDTP) (Figure 1). Our data were collected from NHANES 1999–2004 during three, two-year collection cycles and are representative of the civilian, non-institutionalized U.S. population, stratified by age, sex, and race/ethnicity.

**Figure 1.** Structures of dialkylphosphate metabolites of organophosphorus pesticides.

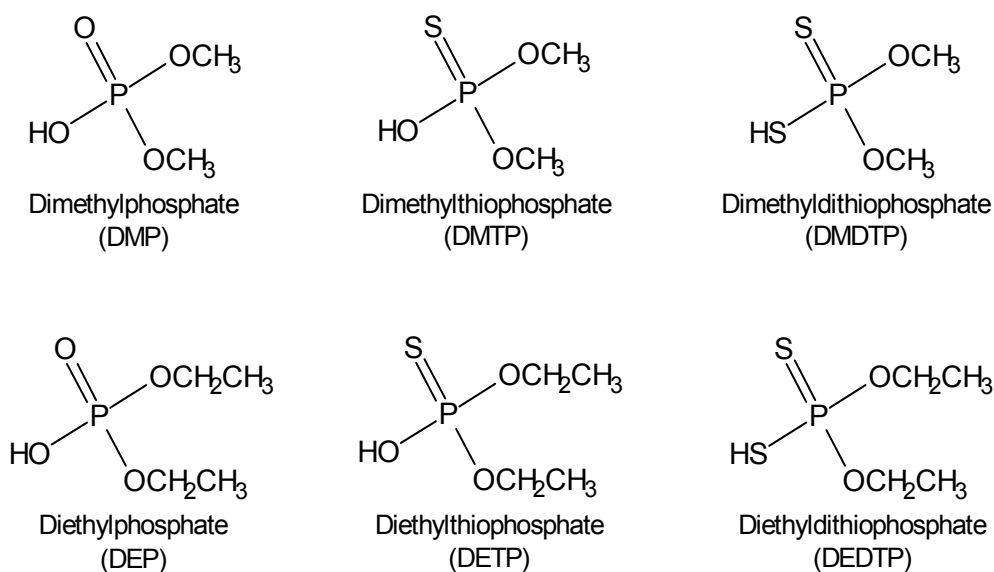

## 2. Experimental

The National Center for Health Statistics of the Centers for Disease Control and Prevention's (NCHS/CDC) National Health and Nutrition Examination Survey (NHANES) is designed to measure the health and nutrition status of the civilian, noninstitutionalized U.S. population [31]. NHANES participants were selected based on their age, sex, and racial/ethnic background through a complex statistical process using the most current census information. For this study, we analyzed urine samples from 7,456 people, an approximate one-third random subset of participants in NHANES 1999–2004. Urine specimens were collected from participants ages six years and older during one of the examination periods conducted three times daily. Sociodemographic information and medical histories of survey participants and their families were collected during the household interview.

The National Centers for Health Statistics Institutional Review Board reviewed and approved the study protocols from NHANES 1999–. Informed written consent was obtained from all participants; informed written consent for participants <18 years of age was obtained from parents or guardians.

### 2.1. Laboratory Methods

During the physical examinations, “spot” urine specimens were collected from participants, aliquoted, and stored cold (2 °C–4 °C) or frozen until shipment. To determine urinary creatinine concentrations, we used an automated colorimetric method based on a modified Jaffe reaction [32] on a Beckman Synchron AS/ASTRA clinical analyzer (Beckman Instruments, Inc., Brea, CA, USA) at the University of Minnesota’s Medical Center. Samples collected for OP pesticide measurements were shipped on dry ice to CDC’s National Center for Environmental Health. Urine samples were analyzed for DAP metabolites of OP pesticides using the methods of Bravo *et al.* [33,34]. The 2002 method was used to analyze samples collected in NHANES III and NHANES 1999–2000. The 2004 method was used for subsequent analyses. Both methods were shown to agree using a Pearson correlation analysis ( $r > 0.97$ ,  $p < 0.001$  for all analytes); a Bland-Altman plot (Figure 2) showed good agreement with no systematic bias between the two methods (mean percent difference  $< 0.5\%$  for all analytes). Briefly, 4 mL of urine were spiked with an isotopically-labeled internal standard mixture, then concentrated to dryness using an azeotropic codistillation with acetonitrile or lyophilization. The dried residue was dissolved in acetonitrile, and the DAPs were derivatized to their respective chloropropyl esters using 1-chloro-3-iodopropane and potassium carbonate. The solution containing the chloropropyl esters was concentrated and then analyzed using gas chromatography-positive chemical ionization-tandem mass spectrometry. The DAP metabolites were quantified using isotope-dilution calibration. The relative standard deviations ranged from 3–18% for these analyses. The analytic limits of detection (LODs) were 0.5–0.58  $\mu\text{g/L}$  for dimethylphosphate (DMP), 0.18–0.5  $\mu\text{g/L}$  for dimethylthiophosphate (DMTP), 0.08–0.2  $\mu\text{g/L}$  for dimethyldithiophosphate (DMDTP), 0.2  $\mu\text{g/L}$  for diethylphosphate (DEP), 0.09–0.1  $\mu\text{g/L}$  for diethylthiophosphate (DETP), and 0.05–0.1  $\mu\text{g/L}$  for diethyldithiophosphate (DEDTP). The LOD differences were considered when making general observations regarding the frequencies of detection. Both laboratories and methods were certified according to the Clinical Laboratory Improvement Amendment [35] guidelines.

**Figure 2.** Bland-Altman plot of percent difference between two measurement methods for dimethylthiophosphate. The mean percent difference is  $-0.32\%$ .

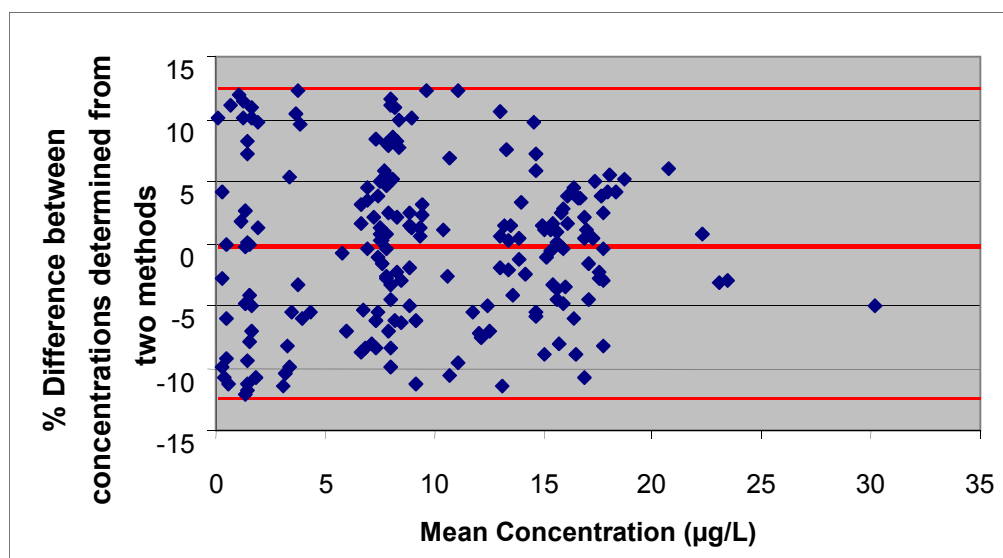

## 2.2. Statistical Analysis

SAS software (version 9.1.3, SAS Institute, Cary, NC, USA) and SUDAAN software (version 9.0.1, Research Triangle Institute, Research Triangle Park, NC, USA) produced estimates, regression coefficients, and related standard errors. SUDAAN uses sample weights to account for the unequal probability of selection. Geometric means were calculated for analytes detected in  $\geq 60\%$  of the samples. For a concentration below the LOD, we used a value equal to the LOD divided by the square root of 2 [36,37]. Spearman correlation coefficients were calculated in SAS.

For the race/ethnicity variable, we included every group in the calculation for total estimates, but only used Mexican Americans (MA), non-Hispanic blacks (NHB) and non-Hispanic whites (NHW) for descriptive analyses and for regression analyses. We stratified age by 6–11, 12–19, 20–39, 40–59 years old and 60 years and older for the geometric mean and the various percentiles.

We used analysis of covariance to examine the influence of demographic variables on the log-transformed urine concentrations for the analytes with  $\geq 70\%$  detection frequency (*i.e.*, DMTP). The least square geometric mean (LSGM) was calculated from the regression model. For multiple regression analyses, the variables included in the initial model were age (continuous), sex (male or female), race/ethnicity (MA, NHB, and NHW) and log-transformed creatinine. We also included an age-squared term in the model for DMTP because the unadjusted geometric mean by age groups indicated a curvilinear relationship between age and the urinary DMTP concentration. We assessed all possible two-way interaction terms in the model. To evaluate the relationship between the log-transformed concentration of all analytes and age, we changed the continuous age to a categorical age-decades variable in the model to generate a bar chart of LSGM concentrations.

To reach the final model, we used backward elimination with a threshold of  $p < 0.05$  for retaining the variable in the model, using Satterwaite-adjusted F statistics. We evaluated for potential confounding by adding each of the excluded variables back into the final model, one-by-one, and examining changes in the  $\beta$  coefficients of the statistically significant main effects. If adding one of these excluded variables caused a change in a  $\beta$  coefficient by  $\geq 10\%$ , the variable was added back into the model. For NHANES 2003–2004 data, we conducted weighted univariate and multiple logistic regression to examine the chance of any demographic group (with sex (male, female), age (6–11, 12–19, 20–59, and 60 years and older), and race/ethnicity (MA, NHB, NHW) having a DAP concentration above the total population 95th percentile.

## 3. Results and Discussion

For 2003–2004, a total of 2,494 samples were available for statistical analysis. Geometric means could not be calculated for any analyte but DMTP because all the other analytes had a detection frequency of less than 60%. The geometric mean concentration and various percentiles stratified by age groups (6–11, 12–19, 20–39, 40–59, and  $\geq 60$  years), race/ethnicity (MA, NHB, NHW) and sex (male, female) for all three NHANES cycles are given in Table 1–Table 6. We analyzed 7,456 samples during the six-year period (1999–2004). No significant differences were noted in analyte concentrations from urine samples collected at different times during the day.

**Table 1.** Dimethylphosphate. Geometric mean and selected percentiles of urine concentrations for the U.S. population from the National Health and Nutrition Examination Surveys. Units are µg/L for unshaded values and µg/g creatinine for shaded values.

|                  | Survey years | Geometric mean<br>(95% confidence limit) | Selected percentile<br>( 95% confidence interval) |                |              |             |             |             |             |             | Sample size | Weighted Detection Percent |      |
|------------------|--------------|------------------------------------------|---------------------------------------------------|----------------|--------------|-------------|-------------|-------------|-------------|-------------|-------------|----------------------------|------|
|                  |              |                                          | 50th                                              | 75th           | 90th         | 95th        | 50th        | 75th        | 90th        | 95th        |             |                            |      |
| <b>Total</b>     | 1999–2000    | *                                        | <b>0.740</b>                                      | (<LOD–1.40)    | <b>2.90</b>  | (2.10–4.00) | <b>7.90</b> | (6.20–8.90) | <b>14.0</b> | (10.0–19.0) | 1949        | 52.2                       |      |
|                  | 2001–2002    | *                                        | <b>&lt;LOD</b>                                    |                | <b>3.25</b>  | (2.77–3.67) | <b>8.22</b> | (6.95–9.27) | <b>13.4</b> | (10.9–15.6) | 2519        | 47.7                       |      |
|                  | 2003–2004    | *                                        | <b>&lt;LOD</b>                                    |                | <b>3.99</b>  | (3.29–4.96) | <b>9.17</b> | (7.33–11.9) | <b>14.8</b> | (12.4–17.8) | 1965        | 48.7                       |      |
|                  | 1999–2000    | *                                        | <b>0.810</b>                                      | (<LOD–1.15)    | <b>2.93</b>  | (2.11–3.92) | <b>8.50</b> | (6.96–10.4) | <b>16.1</b> | (13.3–17.6) | 1949        | 52.2                       |      |
|                  | 2001–2002    | *                                        | <b>&lt;LOD</b>                                    |                | <b>3.00</b>  | (2.69–3.59) | <b>7.83</b> | (7.06–9.28) | <b>12.7</b> | (11.5–15.0) | 2518        | 47.7                       |      |
|                  | 2003–2004    | *                                        | <b>&lt;LOD</b>                                    |                | <b>3.86</b>  | (3.50–5.18) | <b>9.54</b> | (8.78–11.2) | <b>14.6</b> | (13.0–18.1) | 1962        | 48.7                       |      |
| <b>Age group</b> |              |                                          |                                                   |                |              |             |             |             |             |             |             |                            |      |
| 6–11 years       | 1999–2000    | <b>1.58</b>                              | (1.15–2.18)                                       | <b>1.10</b>    | (0.590–2.20) | <b>4.40</b> | (2.80–6.80) | <b>10.0</b> | (9.40–17.0) | <b>22.0</b> | (16.0–33.0) | 471                        | 61.8 |
|                  | 2001–2002    | *                                        |                                                   | <b>0.970</b>   | (<LOD–2.00)  | <b>5.04</b> | (3.31–7.66) | <b>12.2</b> | (9.10–15.0) | <b>18.3</b> | (12.6–41.7) | 576                        | 55   |
|                  | 2003–2004    | *                                        |                                                   | <b>&lt;LOD</b> |              | <b>4.53</b> | (3.34–5.96) | <b>11.0</b> | (5.62–17.9) | <b>16.2</b> | (7.46–28.3) | 310                        | 46.5 |
|                  | 1999–2000    | <b>1.71</b>                              | (1.29–2.27)                                       | <b>1.38</b>    | (0.890–2.38) | <b>4.48</b> | (2.88–8.20) | <b>16.7</b> | (8.21–21.2) | <b>22.1</b> | (19.6–30.1) | 471                        | 61.8 |
|                  | 2001–2002    | *                                        |                                                   | <b>1.93</b>    | (<LOD–2.97)  | <b>5.99</b> | (4.32–8.28) | <b>12.9</b> | (9.09–18.8) | <b>20.6</b> | (13.2–34.9) | 576                        | 55   |
|                  | 2003–2004    | *                                        |                                                   | <b>&lt;LOD</b> |              | <b>6.87</b> | (2.33–8.01) | <b>13.9</b> | (8.23–17.0) | <b>19.6</b> | (13.4–24.9) | 310                        | 46.5 |

Table 1. *Cont.*

|                    | Survey years | Geometric mean<br>(95% confidence limit) | Selected percentile<br>(95% confidence interval) |              |             |             |             |             |             | Sample size | Weighted Detection Percent |      |
|--------------------|--------------|------------------------------------------|--------------------------------------------------|--------------|-------------|-------------|-------------|-------------|-------------|-------------|----------------------------|------|
|                    |              |                                          | 50th                                             | 75th         | 90th        | 95th        |             |             |             |             |                            |      |
| 12–19 years        | 1999–2000    | *                                        | <b>0.670</b>                                     | (<LOD–1.80)  | <b>3.80</b> | (2.50–5.00) | <b>9.90</b> | (6.10–18.0) | <b>22.0</b> | (12.0–29.0) | 664                        | 51   |
|                    | 2001–2002    | *                                        | <b>0.670</b>                                     | (<LOD–1.31)  | <b>4.27</b> | (3.41–5.35) | <b>9.27</b> | (7.80–12.3) | <b>14.7</b> | (11.8–21.3) | 822                        | 50   |
|                    | 2003–2004    | *                                        | <b>&lt;LOD</b>                                   |              | <b>4.61</b> | (3.47–6.72) | <b>10.9</b> | (7.90–15.0) | <b>20.9</b> | (12.5–26.8) | 717                        | 51.3 |
|                    | 1999–2000    | *                                        | <b>0.590</b>                                     | (<LOD–0.950) | <b>2.28</b> | (1.72–2.80) | <b>7.78</b> | (4.16–14.4) | <b>16.0</b> | (8.70–35.3) | 664                        | 51   |
|                    | 2001–2002    | *                                        | <b>0.910</b>                                     | (<LOD–1.25)  | <b>3.29</b> | (2.77–3.78) | <b>6.29</b> | (5.51–7.31) | <b>9.83</b> | (7.94–14.2) | 821                        | 50   |
|                    | 2003–2004    | *                                        | <b>1.00</b>                                      | (<LOD–1.68)  | <b>4.16</b> | (3.37–5.07) | <b>8.81</b> | (7.78–10.2) | <b>12.7</b> | (10.3–17.7) | 715                        | 51.3 |
| 20–59 years        | 1999–2000    | *                                        | <b>0.680</b>                                     | (<LOD–1.30)  | <b>2.70</b> | (1.80–3.60) | <b>6.50</b> | (5.70–8.10) | <b>9.60</b> | (8.80–14.0) | 814                        | 50.9 |
|                    | 2001–2002    | *                                        | <b>&lt;LOD</b>                                   |              | <b>2.95</b> | (2.35–3.41) | <b>6.95</b> | (5.80–8.84) | <b>11.5</b> | (9.80–14.1) | 1121                       | 45.7 |
|                    | 2003–2004    | *                                        | <b>&lt;LOD</b>                                   |              | <b>3.75</b> | (2.84–4.88) | <b>8.52</b> | (8.14–13.5) | <b>14.1</b> | (10.8–17.5) | 938                        | 46.1 |
|                    | 1999–2000    | *                                        | <b>0.760</b>                                     | (<LOD–1.12)  | <b>2.88</b> | (1.89–3.99) | <b>8.11</b> | (5.89–10.3) | <b>14.6</b> | (10.4–16.4) | 814                        | 50.9 |
|                    | 2001–2002    | *                                        | <b>&lt;LOD</b>                                   |              | <b>2.55</b> | (2.05–3.02) | <b>6.92</b> | (5.85–8.00) | <b>11.5</b> | (9.38–13.6) | 1121                       | 45.7 |
|                    | 2003–2004    | *                                        | <b>&lt;LOD</b>                                   |              | <b>3.77</b> | (2.72–4.55) | <b>8.78</b> | (6.68–10.5) | <b>13.5</b> | (12.5–18.1) | 937                        | 46.1 |
| 60 years and older | 2001–2002    | *                                        | <b>0.700</b>                                     | (<LOD–1.50)  | <b>3.68</b> | (2.91–4.56) | <b>8.93</b> | (6.79–10.7) | <b>14.4</b> | (9.63–19.1) | 498                        | 48.8 |
|                    | 2003–2004    | *                                        | <b>1.51</b>                                      | (<LOD–2.35)  | <b>4.16</b> | (3.52–4.93) | <b>9.81</b> | (6.65–12.4) | <b>15.0</b> | (11.9–18.6) | 529                        | 57   |
|                    | 2001–2002    | *                                        | <b>1.45</b>                                      | (<LOD–2.00)  | <b>4.30</b> | (3.44–5.38) | <b>10.6</b> | (7.92–12.0) | <b>14.3</b> | (11.7–18.5) | 498                        | 48.8 |
|                    | 2003–2004    | *                                        | <b>1.67</b>                                      | (<LOD–2.33)  | <b>5.13</b> | (3.84–6.79) | <b>11.7</b> | (9.43–14.4) | <b>16.7</b> | (12.3–23.4) | 529                        | 57   |

Table 1. Cont.

|                       | Survey years | Geometric mean<br>(95% confidence limit) | Selected percentile<br>(95% confidence interval) |              |             |             |             |             |             | Sample size | Weighted Detection Percent |      |
|-----------------------|--------------|------------------------------------------|--------------------------------------------------|--------------|-------------|-------------|-------------|-------------|-------------|-------------|----------------------------|------|
|                       |              |                                          | 50th                                             | 75th         | 90th        | 95th        | 95th        | 95th        | 95th        |             |                            |      |
| <b>Sex</b>            |              |                                          |                                                  |              |             |             |             |             |             |             |                            |      |
| Males                 | 1999–2000    | *                                        | <b>0.670</b>                                     | (<LOD–1.30)  | <b>2.90</b> | (2.20–4.00) | <b>7.50</b> | (6.00–9.30) | <b>18.0</b> | (10.0–23.0) | 952                        | 51.5 |
|                       | 2001–2002    | *                                        | <b>&lt;LOD</b>                                   |              | <b>3.40</b> | (2.49–4.30) | <b>8.22</b> | (6.67–10.3) | <b>12.6</b> | (11.3–14.7) | 1187                       | 48.1 |
|                       | 2003–2004    | *                                        | <b>&lt;LOD</b>                                   |              | <b>3.89</b> | (2.97–4.89) | <b>8.14</b> | (6.34–10.4) | <b>15.1</b> | (11.3–20.4) | 946                        | 46.5 |
|                       | 1999–2000    | *                                        | <b>0.620</b>                                     | (<LOD–0.940) | <b>2.38</b> | (1.83–3.18) | <b>7.58</b> | (4.64–11.6) | <b>15.2</b> | (9.84–19.5) | 952                        | 51.5 |
|                       | 2001–2002    | *                                        | <b>&lt;LOD</b>                                   |              | <b>2.61</b> | (2.35–3.18) | <b>6.25</b> | (5.51–8.54) | <b>10.2</b> | (9.71–12.7) | 1187                       | 48.1 |
|                       | 2003–2004    | *                                        | <b>&lt;LOD</b>                                   |              | <b>2.95</b> | (2.58–4.02) | <b>7.93</b> | (6.80–10.4) | <b>12.5</b> | (10.5–15.4) | 945                        | 46.5 |
| Females               | 1999–2000    | *                                        | <b>0.790</b>                                     | (<LOD–1.60)  | <b>2.90</b> | (1.90–4.20) | <b>7.80</b> | (5.70–9.00) | <b>11.0</b> | (9.00–15.0) | 997                        | 53   |
|                       | 2001–2002    | *                                        | <b>&lt;LOD</b>                                   |              | <b>3.06</b> | (2.63–3.63) | <b>8.34</b> | (6.56–9.63) | <b>13.7</b> | (10.6–17.6) | 1332                       | 47.3 |
|                       | 2003–2004    | *                                        | <b>&lt;LOD</b>                                   |              | <b>4.18</b> | (3.29–5.39) | <b>10.3</b> | (7.60–12.9) | <b>14.8</b> | (13.3–19.0) | 1019                       | 50.9 |
|                       | 1999–2000    | *                                        | <b>1.00</b>                                      | (<LOD–1.71)  | <b>3.63</b> | (2.30–5.19) | <b>9.12</b> | (7.82–11.7) | <b>16.4</b> | (11.7–19.7) | 997                        | 53   |
|                       | 2001–2002    | *                                        | <b>&lt;LOD</b>                                   |              | <b>3.43</b> | (2.86–4.50) | <b>9.00</b> | (7.83–10.6) | <b>15.0</b> | (12.7–17.8) | 1331                       | 47.3 |
|                       | 2003–2004    | *                                        | <b>&lt;LOD</b>                                   |              | <b>5.00</b> | (4.03–6.48) | <b>10.1</b> | (9.65–13.8) | <b>16.0</b> | (14.8–20.6) | 1017                       | 50.9 |
| <b>Race/ethnicity</b> |              |                                          |                                                  |              |             |             |             |             |             |             |                            |      |
| Non-Hispanic whites   | 1999–2000    | *                                        | <b>&lt;LOD</b>                                   |              | <b>2.90</b> | (1.80–4.30) | <b>7.90</b> | (5.90–9.00) | <b>11.0</b> | (9.00–18.0) | 595                        | 48.7 |
|                       | 2001–2002    | *                                        | <b>&lt;LOD</b>                                   |              | <b>3.01</b> | (2.49–3.57) | <b>7.39</b> | (6.52–9.22) | <b>12.3</b> | (10.3–14.4) | 948                        | 46.5 |
|                       | 2003–2004    | *                                        | <b>&lt;LOD</b>                                   |              | <b>3.75</b> | (3.85–6.22) | <b>8.35</b> | (8.18–14.8) | <b>14.6</b> | (14.0–23.2) | 757                        | 49.7 |



Table 1. Cont.

| Survey years        | Geometric mean<br>(95% confidence limit) | Selected percentile<br>(95% confidence interval) |              |              |              |             |             |             |             | Sample size | Weighted Detection Percent |      |      |
|---------------------|------------------------------------------|--------------------------------------------------|--------------|--------------|--------------|-------------|-------------|-------------|-------------|-------------|----------------------------|------|------|
|                     |                                          | 50th                                             | 75th         | 90th         | 95th         |             |             |             |             |             |                            |      |      |
| 1999–2000           | *                                        | <LOD                                             | <b>3.15</b>  | (1.97–4.30)  | <b>8.73</b>  | (5.89–13.3) | <b>15.8</b> | (10.0–21.6) | 595         | 48.7        |                            |      |      |
| 2001–2002           | *                                        | <LOD                                             | <b>2.77</b>  | (2.50–3.66)  | <b>8.00</b>  | (6.71–9.94) | <b>12.9</b> | (11.3–16.9) | 948         | 46.5        |                            |      |      |
| 2003–2004           | *                                        | <LOD                                             | <b>3.89</b>  | (3.98–6.74)  | <b>9.67</b>  | (9.75–12.7) | <b>14.6</b> | (13.0–19.6) | 756         | 49.7        |                            |      |      |
| Mexican Americans   | 1999–2000                                | *                                                | <b>1.10</b>  | (<LOD–1.80)  | <b>3.80</b>  | (2.70–5.10) | <b>9.60</b> | (6.00–15.0) | <b>16.0</b> | (10.0–27.0) | 672                        | 57.5 |      |
|                     | 2001–2002                                | *                                                | <b>0.670</b> | (<LOD–1.52)  | <b>3.24</b>  | (2.45–4.42) | <b>9.23</b> | (7.14–10.7) | <b>14.4</b> | (11.0–20.6) | 678                        | 50.7 |      |
|                     | 2003–2004                                | *                                                | <LOD         |              | <b>4.37</b>  | (3.15–6.88) | <b>10.3</b> | (6.92–17.8) | <b>23.3</b> | (9.61–32.5) | 498                        | 46.4 |      |
|                     | 1999–2000                                | *                                                | <b>1.06</b>  | (<LOD–1.55)  | <b>3.89</b>  | (2.54–5.45) | <b>9.41</b> | (7.69–11.5) | <b>16.7</b> | (11.7–24.3) | 672                        | 57.5 |      |
|                     | 2001–2002                                | *                                                | <b>0.920</b> | (<LOD–1.33)  | <b>3.03</b>  | (2.52–3.78) | <b>8.03</b> | (6.24–11.1) | <b>14.6</b> | (11.4–16.2) | 678                        | 50.7 |      |
|                     | 2003–2004                                | *                                                | <LOD         |              | <b>4.14</b>  | (2.44–6.30) | <b>12.3</b> | (7.39–17.6) | <b>19.5</b> | (15.3–21.8) | 497                        | 46.4 |      |
| Non-Hispanic blacks | 1999–2000                                | <b>1.42</b>                                      | (1.16–1.74)  | <b>1.00</b>  | (0.620–1.50) | <b>3.60</b> | (2.50–5.50) | <b>8.90</b> | (6.90–15.0) | <b>21.0</b> | (15.0–24.0)                | 509  | 59.9 |
|                     | 2001–2002                                | *                                                |              | <b>0.910</b> | (<LOD–2.29)  | <b>5.45</b> | (3.81–6.62) | <b>11.5</b> | (8.77–14.1) | <b>19.4</b> | (14.7–22.8)                | 695  | 52.2 |
|                     | 2003–2004                                | *                                                |              | <LOD         |              | <b>5.12</b> | (4.11–6.37) | <b>10.5</b> | (8.31–12.0) | <b>14.3</b> | (11.7–19.6)                | 579  | 49.6 |
|                     | 1999–2000                                | <b>0.973</b>                                     | (0.780–1.21) | <b>0.690</b> | (0.530–1.06) | <b>2.67</b> | (1.89–3.77) | <b>7.07</b> | (5.09–10.9) | <b>14.0</b> | (10.6–19.1)                | 509  | 59.9 |
|                     | 2001–2002                                | *                                                |              | <b>0.850</b> | (<LOD–1.34)  | <b>3.36</b> | (2.74–4.22) | <b>7.63</b> | (6.35–9.45) | <b>13.2</b> | (10.8–15.0)                | 694  | 52.2 |
|                     | 2003–2004                                | *                                                |              | <LOD         |              | <b>3.38</b> | (2.75–3.95) | <b>6.94</b> | (4.86–7.43) | <b>10.8</b> | (7.46–15.3)                | 578  | 49.6 |

<LOD means less than the limit of detection.

\* Not calculated. Proportion of results below limit of detection was too high to provide a valid result.

**Table 2.** Diethylphosphate. Geometric mean and selected percentiles of urine concentrations for the U.S. population from the National Health and Nutrition Examination Surveys. Units are µg/L for unshaded values and µg/g creatinine for shaded values.

|                  | Survey years | Geometric mean<br>(95% confidence limit) | Selected percentile<br>(95% confidence interval) |                            |                            |                            |      |      |      |      | Sample size | Weighted Detection Percent |
|------------------|--------------|------------------------------------------|--------------------------------------------------|----------------------------|----------------------------|----------------------------|------|------|------|------|-------------|----------------------------|
|                  |              |                                          | 50th                                             | 75th                       | 90th                       | 95th                       | 50th | 75th | 90th | 95th |             |                            |
| <b>Total</b>     | 1999–2000    | <b>1.03</b><br>(0.670–1.58)              | <b>1.20</b><br>(0.750–1.70)                      | <b>3.20</b><br>(2.30–4.80) | <b>7.60</b><br>(5.00–12.0) | <b>13.0</b><br>(7.90–23.0) | 1949 | 69.2 |      |      |             |                            |
|                  | 2001–2002    | *                                        | <LOD                                             | <b>2.76</b><br>(2.50–3.26) | <b>6.33</b><br>(5.71–7.52) | <b>11.4</b><br>(9.14–11.9) | 2520 | 48.2 |      |      |             |                            |
|                  | 2003–2004    | *                                        | <LOD                                             | <b>4.54</b><br>(3.57–5.83) | <b>10.2</b><br>(9.00–11.5) | <b>15.7</b><br>(13.5–16.9) | 1931 | 48.3 |      |      |             |                            |
|                  | 1999–2000    | <b>0.924</b><br>(0.608–1.41)             | <b>0.920</b><br>(0.570–1.40)                     | <b>2.73</b><br>(1.68–4.60) | <b>7.94</b><br>(4.40–12.2) | <b>12.2</b><br>(8.00–19.6) | 1949 | 69.2 |      |      |             |                            |
|                  | 2001–2002    | *                                        | <LOD                                             | <b>2.39</b><br>(2.17–2.86) | <b>5.23</b><br>(4.75–6.06) | <b>8.53</b><br>(7.25–10.2) | 3017 | 48.2 |      |      |             |                            |
|                  | 2003–2004    | *                                        | <LOD                                             | <b>4.42</b><br>(3.82–5.79) | <b>9.02</b><br>(7.85–10.8) | <b>13.2</b><br>(10.5–16.1) | 2450 | 48.3 |      |      |             |                            |
| <b>Age group</b> |              |                                          |                                                  |                            |                            |                            |      |      |      |      |             |                            |
| 6–11 years       | 1999–2000    | <b>1.32</b><br>(0.757–2.29)              | <b>1.50</b><br>(0.940–2.50)                      | <b>4.50</b><br>(2.00–7.80) | <b>11.0</b><br>(5.80–20.0) | <b>16.0</b><br>(8.50–35.0) | 471  | 72.9 |      |      |             |                            |
|                  | 2001–2002    | *                                        | <b>0.290</b><br>(<LOD–1.04)                      | <b>3.45</b><br>(2.41–4.47) | <b>9.56</b><br>(6.44–17.8) | <b>20.0</b><br>(9.44–38.2) | 576  | 50.4 |      |      |             |                            |
|                  | 2003–2004    | *                                        | <LOD                                             | <b>5.13</b><br>(1.84–6.64) | <b>10.9</b><br>(7.50–13.8) | <b>16.1</b><br>(10.4–18.5) | 308  | 45.8 |      |      |             |                            |
|                  | 1999–2000    | <b>1.43</b><br>(0.870–2.34)              | <b>1.47</b><br>(1.02–2.43)                       | <b>3.94</b><br>(2.20–8.57) | <b>10.5</b><br>(4.50–20.8) | <b>16.6</b><br>(10.5–32.7) | 471  | 72.9 |      |      |             |                            |
|                  | 2001–2002    | *                                        | <b>0.890</b><br>(<LOD–1.76)                      | <b>4.02</b><br>(2.87–5.25) | <b>8.85</b><br>(6.88–15.6) | <b>18.4</b><br>(9.40–28.9) | 576  | 50.4 |      |      |             |                            |
|                  | 2003–2004    | *                                        | <LOD                                             | <b>6.10</b><br>(2.93–8.45) | <b>11.9</b><br>(8.45–13.3) | <b>16.1</b><br>(11.6–21.7) | 308  | 45.8 |      |      |             |                            |

Table 2. Cont.

|                    | Survey years | Geometric mean         |              | Selected percentile (95% confidence interval) |              |             |             |             |             |             |             | Sample size | Weighted Detection Percent |
|--------------------|--------------|------------------------|--------------|-----------------------------------------------|--------------|-------------|-------------|-------------|-------------|-------------|-------------|-------------|----------------------------|
|                    |              | (95% confidence limit) |              | 50th                                          | 75th         | 90th        | 95th        |             |             |             |             |             |                            |
| 12–19 years        | 1999–2000    | <b>1.21</b>            | (0.758–1.94) | <b>1.40</b>                                   | (1.00–2.00)  | <b>3.70</b> | (2.30–5.40) | <b>7.90</b> | (4.70–20.0) | <b>20.0</b> | (8.00–27.0) | 664         | 73.7                       |
|                    | 2001–2002    | *                      |              | <b>&lt;LOD</b>                                |              | <b>2.86</b> | (1.98–3.95) | <b>7.58</b> | (5.71–9.15) | <b>11.0</b> | (9.45–12.4) | 822         | 44.6                       |
|                    | 2003–2004    | *                      |              | <b>0.530</b>                                  | (<LOD–2.32)  | <b>5.80</b> | (4.34–7.67) | <b>14.8</b> | (9.12–19.8) | <b>20.8</b> | (14.8–32.7) | 701         | 50.3                       |
|                    | 1999–2000    | <b>0.818</b>           | (0.533–1.26) | <b>0.790</b>                                  | (0.560–1.25) | <b>2.35</b> | (1.37–3.78) | <b>5.44</b> | (2.82–14.4) | <b>12.4</b> | (4.66–34.2) | 664         | 73.7                       |
|                    | 2001–2002    | *                      |              | <b>&lt;LOD</b>                                |              | <b>2.05</b> | (1.55–2.67) | <b>4.40</b> | (3.38–5.28) | <b>7.28</b> | (5.28–9.75) | 821         | 44.6                       |
|                    | 2003–2004    | *                      |              | <b>0.440</b>                                  | (<LOD–2.05)  | <b>4.47</b> | (3.90–5.43) | <b>10.1</b> | (7.10–13.5) | <b>14.7</b> | (7.31–18.2) | 699         | 50.3                       |
| 20–59 years        | 1999–2000    | <b>0.955</b>           | (0.623–1.47) | <b>1.10</b>                                   | (0.690–1.60) | <b>3.00</b> | (1.80–4.70) | <b>7.30</b> | (4.70–11.0) | <b>11.0</b> | (6.80–22.0) | 814         | 67.6                       |
|                    | 2001–2002    | *                      |              | <b>&lt;LOD</b>                                |              | <b>2.71</b> | (2.34–3.12) | <b>5.79</b> | (5.05–7.12) | <b>10.4</b> | (7.52–12.4) | 1122        | 48.1                       |
|                    | 2003–2004    | *                      |              | <b>&lt;LOD</b>                                |              | <b>4.37</b> | (3.86–7.20) | <b>9.74</b> | (8.35–11.3) | <b>14.2</b> | (11.5–16.2) | 922         | 46.2                       |
|                    | 1999–2000    | <b>0.883</b>           | (0.574–1.36) | <b>0.860</b>                                  | (0.500–1.35) | <b>2.66</b> | (1.53–4.95) | <b>7.37</b> | (4.32–12.1) | <b>12.1</b> | (8.00–16.7) | 814         | 67.6                       |
|                    | 2001–2002    | *                      |              | <b>&lt;LOD</b>                                |              | <b>2.28</b> | (2.02–2.56) | <b>4.75</b> | (3.92–5.83) | <b>7.37</b> | (5.93–9.72) | 1122        | 48.1                       |
|                    | 2003–2004    | *                      |              | <b>&lt;LOD</b>                                |              | <b>4.29</b> | (3.80–6.32) | <b>8.34</b> | (7.14–11.9) | <b>11.9</b> | (10.1–16.6) | 921         | 46.2                       |
| 60 years and older | 2001–2002    | *                      |              | <b>0.440</b>                                  | (<LOD–1.63)  | <b>3.30</b> | (2.65–4.51) | <b>7.04</b> | (5.17–8.69) | <b>9.41</b> | (8.31–10.6) | 498         | 50.2                       |
|                    | 2003–2004    | *                      |              | <b>1.04</b>                                   | (<LOD–2.79)  | <b>4.51</b> | (3.78–5.34) | <b>8.94</b> | (7.46–10.7) | <b>12.1</b> | (10.0–15.5) | 522         | 55.8                       |
|                    | 2001–2002    | *                      |              | <b>1.00</b>                                   | (<LOD–1.88)  | <b>3.28</b> | (2.74–4.14) | <b>6.50</b> | (4.92–8.21) | <b>9.61</b> | (7.05–14.4) | 498         | 50.2                       |
|                    | 2003–2004    | *                      |              | <b>1.56</b>                                   | (<LOD–2.86)  | <b>4.93</b> | (4.03–6.77) | <b>9.12</b> | (8.04–9.90) | <b>12.5</b> | (9.90–17.0) | 522         | 55.8                       |

Table 2. Cont.

|            | Survey years          | Geometric mean         |              | Selected percentile (95% confidence interval) |              |              |             |             |             |             |             | Sample size | Weighted Detection Percent |      |
|------------|-----------------------|------------------------|--------------|-----------------------------------------------|--------------|--------------|-------------|-------------|-------------|-------------|-------------|-------------|----------------------------|------|
|            |                       | (95% confidence limit) |              | 50th                                          | 75th         |              | 90th        |             | 95th        |             |             |             |                            |      |
| <b>Sex</b> |                       |                        |              |                                               |              |              |             |             |             |             |             |             |                            |      |
| Males      | 1999–2000             | <b>1.11</b>            | (0.717–1.73) | <b>1.20</b>                                   | (0.830–1.70) | <b>3.80</b>  | (2.50–5.00) | <b>8.00</b> | (5.00–19.0) | <b>19.0</b> | (7.20–30.0) | 952         | 70.8                       |      |
|            | 2001–2002             | *                      |              | <LOD                                          |              | <b>3.13</b>  | (2.67–3.56) | <b>6.99</b> | (5.83–7.71) | <b>11.5</b> | (9.31–12.1) | 1187        | 47.4                       |      |
|            | 2003–2004             | *                      |              | <LOD                                          |              | <b>4.85</b>  | (3.97–6.56) | <b>11.1</b> | (10.1–12.7) | <b>17.2</b> | (14.2–18.8) | 928         | 46.5                       |      |
|            | 1999–2000             | <b>0.855</b>           | (0.566–1.29) | <b>0.820</b>                                  | (0.510–1.34) | <b>2.61</b>  | (1.76–4.03) | <b>7.69</b> | (4.41–12.1) | <b>12.2</b> | (6.94–23.8) | 952         | 70.8                       |      |
|            | 2001–2002             | *                      |              | <LOD                                          |              | <b>2.04</b>  | (1.88–2.64) | <b>4.31</b> | (3.94–5.29) | <b>6.88</b> | (5.79–9.42) | 1420        | 47.4                       |      |
|            | 2003–2004             | *                      |              | <LOD                                          |              | <b>4.03</b>  | (3.35–5.30) | <b>8.34</b> | (7.10–10.1) | <b>12.1</b> | (9.31–14.7) | 1197        | 46.5                       |      |
|            | 1999–2000             | <b>0.954</b>           | (0.599–1.52) | <b>1.20</b>                                   | (0.630–1.70) | <b>2.90</b>  | (1.80–4.80) | <b>7.50</b> | (4.60–11.0) | <b>11.0</b> | (7.60–16.0) | 997         | 67.6                       |      |
|            | 2001–2002             | *                      |              | <b>0.290</b>                                  | (<LOD–0.780) | <b>2.58</b>  | (2.22–3.07) | <b>5.93</b> | (4.59–8.38) | <b>10.4</b> | (7.52–14.5) | 1333        | 49                         |      |
|            | 2003–2004             | *                      |              | <LOD                                          |              | <b>4.39</b>  | (3.17–5.78) | <b>9.39</b> | (8.17–10.8) | <b>13.5</b> | (11.3–15.9) | 1003        | 50.1                       |      |
| Females    | 1999–2000             | <b>0.996</b>           | (0.620–1.60) | <b>0.960</b>                                  | (0.540–1.62) | <b>2.81</b>  | (1.45–5.85) | <b>8.00</b> | (4.05–13.6) | <b>12.1</b> | (6.49–19.6) | 997         | 67.6                       |      |
|            | 2001–2002             | *                      |              | <b>0.780</b>                                  | (<LOD–1.29)  | <b>2.66</b>  | (2.44–3.33) | <b>6.28</b> | (4.95–7.76) | <b>9.57</b> | (7.12–13.6) | 1597        | 49                         |      |
|            | 2003–2004             | *                      |              | <LOD                                          |              | <b>4.87</b>  | (3.98–6.82) | <b>9.83</b> | (8.25–11.8) | <b>13.8</b> | (10.9–21.1) | 1253        | 50.1                       |      |
|            | 1999–2000             | <b>0.981</b>           | (0.579–1.66) | <b>1.10</b>                                   | (0.490–2.10) | <b>3.30</b>  | (2.20–4.90) | <b>7.60</b> | (4.70–14.0) | <b>14.0</b> | (7.60–25.0) | 595         | 66.7                       |      |
|            | 2001–2002             | *                      |              | <LOD                                          |              | <b>2.44</b>  | (2.20–3.15) | <b>5.56</b> | (5.05–7.36) | <b>10.2</b> | (8.38–11.6) | 948         | 47                         |      |
|            | 2003–2004             | *                      |              | <LOD                                          |              | <b>4.16</b>  | (3.98–7.11) | <b>9.74</b> | (8.40–11.6) | <b>14.8</b> | (12.5–17.2) | 752         | 47.4                       |      |
|            | <b>Race/ethnicity</b> |                        |              |                                               |              |              |             |             |             |             |             |             |                            |      |
|            | Non-Hispanic whites   | 1999–2000              | <b>0.981</b> | (0.579–1.66)                                  | <b>1.10</b>  | (0.490–2.10) | <b>3.30</b> | (2.20–4.90) | <b>7.60</b> | (4.70–14.0) | <b>14.0</b> | (7.60–25.0) | 595                        | 66.7 |
|            |                       | 2001–2002              | *            |                                               | <LOD         |              | <b>2.44</b> | (2.20–3.15) | <b>5.56</b> | (5.05–7.36) | <b>10.2</b> | (8.38–11.6) | 948                        | 47   |
| 2003–2004  |                       | *                      |              | <LOD                                          |              | <b>4.16</b>  | (3.98–7.11) | <b>9.74</b> | (8.40–11.6) | <b>14.8</b> | (12.5–17.2) | 752         | 47.4                       |      |

Table 2. Cont.

|                     | Survey years | Geometric mean<br>(95% confidence limit) | Selected percentile<br>(95% confidence interval) |                         |                          |                         |      |      |      |      | Sample size | Weighted Detection Percent |
|---------------------|--------------|------------------------------------------|--------------------------------------------------|-------------------------|--------------------------|-------------------------|------|------|------|------|-------------|----------------------------|
|                     |              |                                          | 50th                                             | 75th                    | 90th                     | 95th                    | 50th | 75th | 90th | 95th |             |                            |
|                     | 1999–2000    | <b>0.932</b> (0.549–1.58)                | <b>0.900</b> (0.430–1.68)                        | <b>2.87</b> (1.51–5.88) | <b>8.57</b> (4.40–14.4)  | <b>13.0</b> (8.21–23.8) | 595  | 66.7 |      |      |             |                            |
|                     | 2001–2002    | *                                        | <LOD                                             | <b>2.30</b> (2.04–2.95) | <b>4.95</b> (4.53–5.93)  | <b>7.80</b> (6.61–10.7) | 1265 | 47   |      |      |             |                            |
|                     | 2003–2004    | *                                        | <LOD                                             | <b>4.47</b> (4.27–6.90) | <b>9.03</b> (8.34–11.6)  | <b>12.1</b> (10.9–17.0) | 1071 | 47.4 |      |      |             |                            |
| Mexican Americans   | 1999–2000    | <b>1.22</b> (0.740–2.01)                 | <b>1.20</b> (0.840–1.70)                         | <b>4.10</b> (2.20–7.00) | <b>11.0</b> (6.40–18.0)  | <b>18.0</b> (12.0–23.0) | 672  | 72.6 |      |      |             |                            |
|                     | 2001–2002    | *                                        | <b>0.600</b> (<LOD–1.49)                         | <b>3.10</b> (2.27–3.72) | <b>6.26</b> (5.00–7.80)  | <b>11.2</b> (7.80–12.4) | 678  | 54.7 |      |      |             |                            |
|                     | 2003–2004    | *                                        | <b>1.08</b> (<LOD–2.81)                          | <b>5.58</b> (2.08–4.85) | <b>10.8</b> (8.35–16.1)  | <b>17.7</b> (12.0–28.4) | 473  | 54.7 |      |      |             |                            |
|                     | 1999–2000    | <b>1.09</b> (0.633–1.89)                 | <b>1.05</b> (0.640–1.98)                         | <b>3.78</b> (2.13–6.46) | <b>9.84</b> (5.66–15.7)  | <b>15.7</b> (8.61–29.0) | 672  | 72.6 |      |      |             |                            |
|                     | 2001–2002    | *                                        | <b>0.890</b> (<LOD–1.42)                         | <b>2.38</b> (1.77–3.19) | <b>5.00</b> (4.10–6.53)  | <b>7.66</b> (6.40–10.2) | 763  | 54.7 |      |      |             |                            |
|                     | 2003–2004    | *                                        | <b>0.960</b> (<LOD–1.38)                         | <b>4.43</b> (3.03–6.69) | <b>9.80</b> (7.56–13.3)  | <b>16.6</b> (8.18–20.2) | 580  | 54.7 |      |      |             |                            |
| Non-Hispanic blacks | 1999–2000    | <b>1.56</b> (1.13–2.14)                  | <b>1.60</b> (1.30–1.80)                          | <b>4.30</b> (2.90–5.80) | <b>10.0</b> (5.60–18.0)  | <b>18.0</b> (8.00–27.0) | 509  | 79.8 |      |      |             |                            |
|                     | 2001–2002    | *                                        | <b>0.890</b> (<LOD–2.31)                         | <b>4.61</b> (3.48–6.52) | <b>10.2</b> (7.40–13.9)  | <b>15.4</b> (10.1–23.4) | 696  | 51.9 |      |      |             |                            |
|                     | 2003–2004    | *                                        | <b>0.830</b> (<LOD–3.28)                         | <b>6.83</b> (5.26–8.80) | <b>12.2</b> (9.86–15.6)  | <b>16.2</b> (14.1–23.2) | 578  | 50.1 |      |      |             |                            |
|                     | 1999–2000    | <b>1.07</b> (0.773–1.47)                 | <b>1.18</b> (0.830–1.54)                         | <b>2.61</b> (1.89–3.47) | <b>5.98</b> (3.96–9.67)  | <b>11.9</b> (5.98–19.7) | 509  | 79.8 |      |      |             |                            |
|                     | 2001–2002    | *                                        | <b>0.780</b> (<LOD–1.60)                         | <b>2.80</b> (2.57–3.61) | <b>7.02</b> (5.41–8.72)  | <b>9.75</b> (7.84–12.1) | 769  | 51.9 |      |      |             |                            |
|                     | 2003–2004    | *                                        | <b>0.710</b> (<LOD–1.98)                         | <b>4.14</b> (3.46–5.09) | <b>7.77</b> (6.57–10.5)) | <b>11.7</b> (10.5–13.4) | 644  | 50.1 |      |      |             |                            |

<LOD means less than the limit of detection.

\* Not calculated. Proportion of results below limit of detection was too high to provide a valid result.

**Table 3.** Dimethylthiophosphate. Geometric mean and selected percentiles of urine concentrations for the U.S. population from the National Health and Nutrition Examination Surveys. Units are  $\mu\text{g/L}$  for unshaded values and  $\mu\text{g/g}$  creatinine for shaded values.

|                  | Survey years | Geometric mean         |             | Selected percentile (95% confidence interval) |              |             |             |             |             |             |             | Sample size | Weighted Detection Percent |
|------------------|--------------|------------------------|-------------|-----------------------------------------------|--------------|-------------|-------------|-------------|-------------|-------------|-------------|-------------|----------------------------|
|                  |              | (95% confidence limit) |             | 50th                                          | 75th         | 90th        | 95th        |             |             |             |             |             |                            |
| <b>Total</b>     | 1999–2000    | <b>1.82</b>            | (1.36–2.44) | <b>2.70</b>                                   | (1.40–4.10)  | <b>11.0</b> | (8.40–16.0) | <b>38.0</b> | (25.0–41.0) | <b>48.0</b> | (38.0–62.0) | 1948        | 62.9                       |
|                  | 2001–2002    | *                      |             | <b>0.470</b>                                  | (<LOD–1.41)  | <b>4.02</b> | (2.92–5.70) | <b>16.2</b> | (12.4–22.9) | <b>32.6</b> | (26.6–45.3) | 2518        | 50.3                       |
|                  | 2003–2004    | <b>2.10</b>            | (1.83–2.40) | <b>1.90</b>                                   | (1.61–2.26)  | <b>5.65</b> | (4.63–6.80) | <b>17.3</b> | (14.5–20.1) | <b>31.1</b> | (26.5–40.0) | 1965        | 76.8                       |
|                  | 1999–2000    | <b>1.64</b>            | (1.22–2.20) | <b>2.12</b>                                   | (1.22–3.35)  | <b>9.57</b> | (6.59–15.8) | <b>32.0</b> | (23.9–41.1) | <b>51.0</b> | (39.0–70.1) | 1948        | 62.9                       |
|                  | 2001–2002    | *                      |             | <b>0.860</b>                                  | (<LOD–1.33)  | <b>3.79</b> | (2.50–5.19) | <b>13.3</b> | (10.9–18.8) | <b>27.2</b> | (21.7–37.7) | 2517        | 50.3                       |
|                  | 2003–2004    | <b>1.97</b>            | (1.71–2.27) | <b>1.75</b>                                   | (1.54–2.06)  | <b>5.21</b> | (4.46–5.95) | <b>15.7</b> | (11.7–19.7) | <b>30.4</b> | (25.4–34.2) | 1962        | 76.8                       |
| <b>Age group</b> |              |                        |             |                                               |              |             |             |             |             |             |             |             |                            |
| 6–11 years       | 1999–2000    | <b>2.72</b>            | (1.93–3.85) | <b>4.20</b>                                   | (2.50–7.20)  | <b>20.0</b> | (13.0–29.0) | <b>40.0</b> | (38.0–52.0) | <b>62.0</b> | (40.0–92.0) | 471         | 67.8                       |
|                  | 2001–2002    | *                      |             | <b>1.46</b>                                   | (0.600–2.69) | <b>8.33</b> | (5.75–14.0) | <b>28.4</b> | (19.7–41.4) | <b>45.7</b> | (28.5–74.5) | 575         | 58.9                       |
|                  | 2003–2004    | <b>2.79</b>            | (2.25–3.45) | <b>2.67</b>                                   | (1.81–3.88)  | <b>6.95</b> | (5.64–8.58) | <b>19.4</b> | (10.5–27.4) | <b>30.9</b> | (19.4–76.5) | 310         | 83.7                       |
|                  | 1999–2000    | <b>2.95</b>            | (2.25–3.86) | <b>5.32</b>                                   | (3.75–6.33)  | <b>19.1</b> | (12.2–28.0) | <b>47.0</b> | (32.1–60.3) | <b>66.1</b> | (50.9–95.0) | 471         | 67.8                       |
|                  | 2001–2002    | *                      |             | <b>2.16</b>                                   | (1.32–3.12)  | <b>10.6</b> | (7.84–13.6) | <b>28.7</b> | (18.8–45.0) | <b>48.1</b> | (33.4–71.1) | 575         | 58.9                       |
|                  | 2003–2004    | <b>3.40</b>            | (2.70–4.28) | <b>3.41</b>                                   | (2.40–4.17)  | <b>7.91</b> | (6.43–12.2) | <b>25.2</b> | (16.8–34.2) | <b>36.1</b> | (25.4–67.7) | 310         | 83.7                       |

Table 3. Cont.

|                    | Survey years | Geometric mean         |             | Selected percentile (95% confidence interval) |              |             |             |             |             |             |             | Sample size | Weighted Detection Percent |
|--------------------|--------------|------------------------|-------------|-----------------------------------------------|--------------|-------------|-------------|-------------|-------------|-------------|-------------|-------------|----------------------------|
|                    |              | (95% confidence limit) |             | 50th                                          | 75th         | 90th        | 95th        | 95th        | 95th        | 95th        | 95th        |             |                            |
| 12–19 years        | 1999–2000    | <b>2.53</b>            | (1.64–3.92) | <b>3.70</b>                                   | (1.70–6.80)  | <b>16.0</b> | (11.0–31.0) | <b>38.0</b> | (33.0–58.0) | <b>69.0</b> | (38.0–260)  | 664         | 66.2                       |
|                    | 2001–2002    | *                      |             | <b>1.04</b>                                   | (<LOD–2.12)  | <b>4.83</b> | (3.35–6.48) | <b>20.8</b> | (12.2–27.9) | <b>34.9</b> | (23.6–54.7) | 822         | 55.9                       |
|                    | 2003–2004    | <b>2.21</b>            | (1.81–2.70) | <b>1.83</b>                                   | (1.46–2.16)  | <b>5.91</b> | (4.04–8.78) | <b>18.7</b> | (12.2–33.9) | <b>47.1</b> | (22.2–80.8) | 717         | 77.4                       |
|                    | 1999–2000    | <b>1.71</b>            | (1.07–2.75) | <b>2.14</b>                                   | (0.890–4.83) | <b>13.5</b> | (6.46–22.6) | <b>36.0</b> | (25.9–51.4) | <b>61.5</b> | (41.7–109)  | 664         | 66.2                       |
|                    | 2001–2002    | *                      |             | <b>0.930</b>                                  | (<LOD–1.56)  | <b>3.56</b> | (2.38–5.57) | <b>12.2</b> | (8.95–16.0) | <b>22.5</b> | (13.2–34.7) | 821         | 55.9                       |
|                    | 2003–2004    | <b>1.66</b>            | (1.37–2.03) | <b>1.52</b>                                   | (1.18–1.82)  | <b>4.38</b> | (3.29–5.66) | <b>13.3</b> | (9.94–20.5) | <b>26.5</b> | (15.5–36.0) | 715         | 77.4                       |
| 20–59 years        | 1999–2000    | <b>1.59</b>            | (1.17–2.16) | <b>2.30</b>                                   | (0.830–3.80) | <b>9.10</b> | (7.10–13.0) | <b>38.0</b> | (19.0–39.0) | <b>39.0</b> | (38.0–58.0) | 813         | 61.3                       |
|                    | 2001–2002    | *                      |             | <b>&lt;LOD</b>                                |              | <b>3.32</b> | (2.29–4.96) | <b>13.6</b> | (9.50–20.0) | <b>30.0</b> | (20.5–45.3) | 1121        | 46.9                       |
|                    | 2003–2004    | <b>1.98</b>            | (1.71–2.30) | <b>1.78</b>                                   | (1.48–2.18)  | <b>5.11</b> | (4.31–6.53) | <b>16.7</b> | (12.1–20.8) | <b>28.5</b> | (24.1–40.0) | 938         | 73.5                       |
|                    | 1999–2000    | <b>1.47</b>            | (1.07–2.02) | <b>1.90</b>                                   | (0.870–3.11) | <b>8.09</b> | (5.19–14.6) | <b>27.0</b> | (19.8–37.6) | <b>47.5</b> | (34.2–70.1) | 813         | 61.3                       |
|                    | 2001–2002    | *                      |             | <b>&lt;LOD</b>                                |              | <b>3.16</b> | (1.99–4.62) | <b>11.9</b> | (7.79–17.2) | <b>25.2</b> | (15.9–37.0) | 1121        | 46.9                       |
|                    | 2003–2004    | <b>1.88</b>            | (1.61–2.19) | <b>1.67</b>                                   | (1.45–1.94)  | <b>4.88</b> | (4.20–5.68) | <b>13.9</b> | (10.3–19.7) | <b>30.4</b> | (19.7–38.2) | 937         | 73.5                       |
| 60 years and older | 2001–2002    | *                      |             | <b>0.860</b>                                  | (<LOD–2.16)  | <b>5.82</b> | (3.33–9.56) | <b>19.2</b> | (13.0–27.9) | <b>31.6</b> | (22.4–51.0) | 498         | 53.7                       |
|                    | 2003–2004    | <b>3.18</b>            | (2.47–4.08) | <b>2.43</b>                                   | (1.95–3.24)  | <b>7.91</b> | (5.07–12.8) | <b>21.2</b> | (12.8–44.8) | <b>44.8</b> | (19.6–119)  | 529         | 84.5                       |
|                    | 2001–2002    | *                      |             | <b>1.39</b>                                   | (<LOD–2.40)  | <b>6.38</b> | (3.68–9.97) | <b>24.0</b> | (15.5–35.2) | <b>45.5</b> | (26.5–69.7) | 498         | 53.7                       |
|                    | 2003–2004    | <b>3.86</b>            | (2.99–4.97) | <b>2.92</b>                                   | (2.21–4.65)  | <b>11.2</b> | (6.92–18.6) | <b>26.0</b> | (17.5–46.7) | <b>47.9</b> | (23.7–92.9) | 529         | 84.5                       |

Table 3. Cont.

|            | Survey years          | Geometric mean         |             | Selected percentile (95% confidence interval) |              |              |             |             |             |             |             | Sample size | Weighted Detection Percent |      |
|------------|-----------------------|------------------------|-------------|-----------------------------------------------|--------------|--------------|-------------|-------------|-------------|-------------|-------------|-------------|----------------------------|------|
|            |                       | (95% confidence limit) |             | 50th                                          | 75th         | 90th         | 95th        | 95th        | 95th        | 95th        |             |             |                            |      |
| <b>Sex</b> |                       |                        |             |                                               |              |              |             |             |             |             |             |             |                            |      |
| Males      | 1999–2000             | <b>2.10</b>            | (1.48–2.98) | <b>3.50</b>                                   | (2.20–4.80)  | <b>14.0</b>  | (8.00–24.0) | <b>38.0</b> | (21.0–49.0) | <b>42.0</b> | (38.0–53.0) | 952         | 65.2                       |      |
|            | 2001–2002             | *                      |             | <b>0.610</b>                                  | (<LOD–1.42)  | <b>4.21</b>  | (3.07–5.97) | <b>18.3</b> | (12.2–27.2) | <b>31.1</b> | (25.0–43.3) | 1187        | 52.2                       |      |
|            | 2003–2004             | <b>2.13</b>            | (1.80–2.53) | <b>1.94</b>                                   | (1.49–2.44)  | <b>6.09</b>  | (4.44–7.23) | <b>16.1</b> | (10.9–21.1) | <b>26.8</b> | (22.0–41.6) | 946         | 78.2                       |      |
|            | 1999–2000             | <b>1.61</b>            | (1.11–2.34) | <b>2.39</b>                                   | (1.27–3.51)  | <b>9.27</b>  | (6.00–16.9) | <b>28.9</b> | (19.0–40.2) | <b>40.4</b> | (34.9–52.9) | 952         | 65.2                       |      |
|            | 2001–2002             | *                      |             | <b>0.780</b>                                  | (<LOD–1.17)  | <b>3.82</b>  | (2.65–5.02) | <b>13.6</b> | (10.0–17.3) | <b>25.2</b> | (17.1–37.6) | 1187        | 52.2                       |      |
|            | 2003–2004             | <b>1.70</b>            | (1.43–2.02) | <b>1.67</b>                                   | (1.38–1.96)  | <b>4.47</b>  | (3.63–5.36) | <b>12.3</b> | (8.47–17.7) | <b>24.5</b> | (17.6–32.5) | 945         | 78.2                       |      |
|            | 1999–2000             | <b>1.59</b>            | (1.23–2.06) | <b>2.00</b>                                   | (0.690–3.60) | <b>9.70</b>  | (7.30–14.0) | <b>38.0</b> | (26.0–39.0) | <b>52.0</b> | (38.0–110)  | 996         | 60.6                       |      |
|            | 2001–2002             | *                      |             |                                               | <LOD         | <b>3.76</b>  | (2.50–5.71) | <b>15.9</b> | (10.6–22.0) | <b>34.3</b> | (23.2–47.3) | 1331        | 48.5                       |      |
|            | 2003–2004             | <b>2.06</b>            | (1.74–2.44) | <b>1.86</b>                                   | (1.58–2.18)  | <b>5.21</b>  | (4.27–6.77) | <b>19.8</b> | (12.8–24.0) | <b>33.8</b> | (26.1–47.8) | 1019        | 75.5                       |      |
| Females    | 1999–2000             | <b>1.66</b>            | (1.26–2.18) | <b>2.01</b>                                   | (0.870–3.33) | <b>10.0</b>  | (6.67–16.2) | <b>34.9</b> | (26.2–47.1) | <b>70.1</b> | (39.0–118)  | 996         | 60.6                       |      |
|            | 2001–2002             | *                      |             |                                               | <LOD         | <b>4.22</b>  | (2.40–7.00) | <b>15.6</b> | (11.3–22.6) | <b>29.6</b> | (24.8–43.8) | 1330        | 48.5                       |      |
|            | 2003–2004             | <b>2.28</b>            | (1.91–2.72) | <b>1.88</b>                                   | (1.59–2.44)  | <b>6.00</b>  | (4.80–8.30) | <b>19.4</b> | (12.8–26.2) | <b>32.6</b> | (27.3–42.0) | 1017        | 75.5                       |      |
|            | 1999–2000             | <b>1.77</b>            | (1.23–2.53) | <b>2.70</b>                                   | (0.830–4.40) | <b>11.0</b>  | (7.50–17.0) | <b>38.0</b> | (17.0–53.0) | <b>48.0</b> | (38.0–69.0) | 595         | 62.3                       |      |
|            | 2001–2002             | *                      |             |                                               | <LOD         | <b>3.99</b>  | (2.46–6.14) | <b>17.3</b> | (10.1–25.0) | <b>33.1</b> | (25.0–50.2) | 947         | 49.7                       |      |
|            | 2003–2004             | <b>2.10</b>            | (1.79–2.45) | <b>1.90</b>                                   | (1.57–2.30)  | <b>5.71</b>  | (4.43–7.10) | <b>17.3</b> | (12.8–21.1) | <b>31.3</b> | (24.0–47.8) | 757         | 77.4                       |      |
|            | <b>Race/ethnicity</b> |                        |             |                                               |              |              |             |             |             |             |             |             |                            |      |
|            | Non-Hispanic whites   | 1999–2000              | <b>1.77</b> | (1.23–2.53)                                   | <b>2.70</b>  | (0.830–4.40) | <b>11.0</b> | (7.50–17.0) | <b>38.0</b> | (17.0–53.0) | <b>48.0</b> | (38.0–69.0) | 595                        | 62.3 |
|            |                       | 2001–2002              | *           |                                               |              | <LOD         | <b>3.99</b> | (2.46–6.14) | <b>17.3</b> | (10.1–25.0) | <b>33.1</b> | (25.0–50.2) | 947                        | 49.7 |
| 2003–2004  |                       | <b>2.10</b>            | (1.79–2.45) | <b>1.90</b>                                   | (1.57–2.30)  | <b>5.71</b>  | (4.43–7.10) | <b>17.3</b> | (12.8–21.1) | <b>31.3</b> | (24.0–47.8) | 757         | 77.4                       |      |



Table 3. Cont.

|                     | Survey years | Geometric mean<br>(95% confidence limit) | Selected percentile<br>(95% confidence interval) |                         |                         |                         |     |      |  |  | Sample size | Weighted Detection Percent |
|---------------------|--------------|------------------------------------------|--------------------------------------------------|-------------------------|-------------------------|-------------------------|-----|------|--|--|-------------|----------------------------|
|                     |              |                                          | 50th                                             | 75th                    | 90th                    | 95th                    |     |      |  |  |             |                            |
|                     | 1999–2000    | <b>1.68</b> (1.16–2.43)                  | <b>2.22</b> (0.870–3.51)                         | <b>9.40</b> (5.58–17.0) | <b>33.3</b> (20.6–49.4) | <b>52.9</b> (39.0–71.1) | 595 | 62.3 |  |  |             |                            |
|                     | 2001–2002    | *                                        | <LOD                                             | <b>3.82</b> (2.19–6.38) | <b>14.3</b> (10.1–22.1) | <b>27.4</b> (21.7–43.8) | 947 | 49.7 |  |  |             |                            |
|                     | 2003–2004    | <b>2.08</b> (1.76–2.48)                  | <b>1.80</b> (1.59–2.27)                          | <b>5.36</b> (4.46–6.23) | <b>17.4</b> (11.4–21.6) | <b>31.7</b> (24.2–38.2) | 756 | 77.4 |  |  |             |                            |
| Mexican Americans   | 1999–2000    | <b>1.79</b> (1.05–3.05)                  | <b>2.00</b> (0.530–4.40)                         | <b>11.0</b> (6.70–17.0) | <b>39.0</b> (32.0–62.0) | <b>140</b> (46.0–230)   | 671 | 61   |  |  |             |                            |
|                     | 2001–2002    | *                                        | <LOD                                             | <b>3.76</b> (2.66–5.18) | <b>15.1</b> (11.1–19.1) | <b>35.2</b> (19.1–46.0) | 678 | 46   |  |  |             |                            |
|                     | 2003–2004    | <b>2.41</b> (1.86–3.11)                  | <b>2.54</b> (1.41–4.04)                          | <b>6.52</b> (4.90–8.13) | <b>18.6</b> (11.7–22.3) | <b>28.9</b> (19.2–39.8) | 498 | 77.3 |  |  |             |                            |
|                     | 1999–2000    | <b>1.60</b> (0.899–2.86)                 | <b>1.83</b> (0.680–4.23)                         | <b>10.4</b> (5.95–16.9) | <b>37.0</b> (23.1–63.1) | <b>112</b> (40.5–190)   | 671 | 61   |  |  |             |                            |
|                     | 2001–2002    | *                                        | <LOD                                             | <b>3.55</b> (2.52–4.93) | <b>13.2</b> (9.61–22.7) | <b>30.2</b> (22.7–47.7) | 678 | 46   |  |  |             |                            |
|                     | 2003–2004    | <b>2.16</b> (1.58–2.94)                  | <b>2.24</b> (1.67–3.00)                          | <b>5.88</b> (4.14–8.71) | <b>11.8</b> (10.7–20.1) | <b>23.7</b> (18.9–36.9) | 497 | 77.3 |  |  |             |                            |
| Non-Hispanic blacks | 1999–2000    | <b>2.13</b> (1.57–2.88)                  | <b>3.60</b> (2.10–4.70)                          | <b>12.0</b> (8.80–18.0) | <b>38.0</b> (20.0–41.0) | <b>41.0</b> (37.0–110)  | 509 | 66.1 |  |  |             |                            |
|                     | 2001–2002    | <b>1.61</b> (1.19–2.19)                  | <b>1.26</b> (0.660–2.05)                         | <b>5.54</b> (3.29–9.41) | <b>20.6</b> (15.6–27.7) | <b>42.9</b> (27.2–62.8) | 695 | 59.9 |  |  |             |                            |
|                     | 2003–2004    | <b>2.10</b> (1.83–2.41)                  | <b>1.85</b> (1.50–2.29)                          | <b>5.12</b> (3.87–7.90) | <b>20.4</b> (15.2–26.1) | <b>32.0</b> (24.9–51.9) | 579 | 76.9 |  |  |             |                            |
|                     | 1999–2000    | <b>1.45</b> (1.03–2.06)                  | <b>1.75</b> (1.17–3.06)                          | <b>8.48</b> (4.36–13.4) | <b>25.5</b> (15.4–39.3) | <b>54.4</b> (25.5–97.6) | 509 | 66.1 |  |  |             |                            |
|                     | 2001–2002    | <b>1.15</b> (0.888–1.48)                 | <b>1.02</b> (0.670–1.35)                         | <b>3.62</b> (2.33–5.18) | <b>13.4</b> (9.69–18.8) | <b>23.0</b> (17.5–43.8) | 694 | 59.9 |  |  |             |                            |
|                     | 2003–2004    | <b>1.37</b> (1.23–1.53)                  | <b>1.19</b> (1.06–1.31)                          | <b>3.50</b> (2.69–5.07) | <b>11.8</b> (7.95–16.2) | <b>23.9</b> (13.3–27.1) | 578 | 76.9 |  |  |             |                            |

<LOD means less than the limit of detection.

\* Not calculated. Proportion of results below limit of detection was too high to provide a valid result.

**Table 4.** Diethylthiophosphate. Geometric mean and selected percentiles of urine concentrations for the U.S. population from the National Health and Nutrition Examination Surveys. Units are µg/L for unshaded values and µg/g creatinine for shaded values.

|                  | Survey years | Geometric mean<br>(95% confidence limit) |               | Selected percentile<br>(95% confidence interval) |               |              |               |             |             |             |             | Sample size | Weighted Detection Percent |
|------------------|--------------|------------------------------------------|---------------|--------------------------------------------------|---------------|--------------|---------------|-------------|-------------|-------------|-------------|-------------|----------------------------|
|                  |              |                                          |               | 50th                                             | 75th          | 90th         | 95th          |             |             |             |             |             |                            |
| <b>Total</b>     | 1999–2000    | *                                        |               | <b>0.500</b>                                     | (<LOD–0.690)  | <b>0.760</b> | (0.620–1.10)  | <b>1.40</b> | (1.10–1.80) | <b>2.20</b> | (1.70–2.80) | 1949        | 52.6                       |
|                  | 2001–2002    | <b>0.457</b>                             | (0.353–0.592) | <b>0.570</b>                                     | (0.390–0.880) | <b>1.53</b>  | (1.25–1.79)   | <b>2.48</b> | (2.22–3.04) | <b>3.94</b> | (3.17–4.95) | 2519        | 69.5                       |
|                  | 2003–2004    | *                                        |               | <b>&lt;LOD</b>                                   |               | <b>0.830</b> | (0.690–0.950) | <b>1.77</b> | (1.42–2.31) | <b>2.80</b> | (2.31–3.78) | 1905        | 49                         |
|                  | 1999–2000    | *                                        |               | <b>0.250</b>                                     | (<LOD–0.480)  | <b>0.710</b> | (0.460–1.07)  | <b>1.72</b> | (1.17–2.32) | <b>2.64</b> | (2.08–3.06) | 1949        | 52.6                       |
|                  | 2001–2002    | <b>0.453</b>                             | (0.348–0.590) | <b>0.520</b>                                     | (0.330–0.760) | <b>1.33</b>  | (1.04–1.66)   | <b>2.84</b> | (2.22–3.76) | <b>4.61</b> | (3.42–6.65) | 2518        | 69.5                       |
|                  | 2003–2004    | *                                        |               | <b>&lt;LOD</b>                                   |               | <b>0.700</b> | (0.580–0.830) | <b>1.47</b> | (1.16–2.04) | <b>2.62</b> | (2.00–3.72) | 1903        | 49                         |
| <b>Age group</b> |              |                                          |               |                                                  |               |              |               |             |             |             |             |             |                            |
| 6–11 years       | 1999–2000    | *                                        |               | <b>0.600</b>                                     | (<LOD–0.810)  | <b>0.910</b> | (0.720–1.30)  | <b>1.70</b> | (1.20–3.20) | <b>3.20</b> | (1.70–7.30) | 471         | 58.1                       |
|                  | 2001–2002    | <b>0.453</b>                             | (0.350–0.585) | <b>0.550</b>                                     | (0.350–0.850) | <b>1.58</b>  | (1.33–2.04)   | <b>2.75</b> | (2.22–3.38) | <b>4.08</b> | (2.95–5.16) | 575         | 68.1                       |
|                  | 2003–2004    | *                                        |               | <b>&lt;LOD</b>                                   |               | <b>0.820</b> | (0.580–0.970) | <b>1.45</b> | (1.05–2.16) | <b>2.18</b> | (1.45–4.13) | 296         | 48.9                       |
|                  | 1999–2000    | *                                        |               | <b>0.470</b>                                     | (<LOD–0.870)  | <b>1.08</b>  | (0.800–1.32)  | <b>1.75</b> | (1.44–2.36) | <b>2.45</b> | (2.04–5.32) | 471         | 58.1                       |
|                  | 2001–2002    | <b>0.591</b>                             | (0.471–0.742) | <b>0.640</b>                                     | (0.400–1.05)  | <b>1.63</b>  | (1.31–1.94)   | <b>3.22</b> | (2.72–4.16) | <b>5.70</b> | (3.84–6.80) | 575         | 68.1                       |
|                  | 2003–2004    | *                                        |               | <b>&lt;LOD</b>                                   |               | <b>0.870</b> | (0.590–1.09)  | <b>1.57</b> | (1.08–2.67) | <b>2.67</b> | (1.57–4.05) | 296         | 48.9                       |

Table 4. Cont.

|                    | Survey years | Geometric mean         |               | Selected percentile (95% confidence interval) |               |              |               |             |              | Sample size | Weighted Detection Percent |      |      |
|--------------------|--------------|------------------------|---------------|-----------------------------------------------|---------------|--------------|---------------|-------------|--------------|-------------|----------------------------|------|------|
|                    |              | (95% confidence limit) |               | 50th                                          | 75th          | 90th         | 95th          |             |              |             |                            |      |      |
| 12–19 years        | 1999–2000    | *                      |               | <b>0.210</b>                                  | (<LOD–0.710)  | <b>0.780</b> | (0.600–1.20)  | <b>1.50</b> | (1.20–2.30)  | <b>2.30</b> | (1.60–4.30)                | 664  | 49.8 |
|                    | 2001–2002    | <b>0.505</b>           | (0.388–0.657) | <b>0.690</b>                                  | (0.440–0.960) | <b>1.61</b>  | (1.32–1.94)   | <b>2.57</b> | (2.23–3.39)  | <b>4.08</b> | (2.73–5.86)                | 822  | 71.8 |
|                    | 2003–2004    | *                      |               | <b>0.260</b>                                  | (LOD–0.670)   | <b>0.930</b> | (0.750–1.13)  | <b>2.14</b> | (1.75–2.89)  | <b>3.27</b> | (2.69–4.83)                | 690  | 51.7 |
|                    | 1999–2000    | *                      |               | <b>0.180</b>                                  | (<LOD–0.400)  | <b>0.510</b> | (0.320–0.820) | <b>1.07</b> | (0.720–1.61) | <b>1.97</b> | (1.07–3.92)                | 664  | 49.8 |
|                    | 2001–2002    | <b>0.393</b>           | (0.300–0.515) | <b>0.530</b>                                  | (0.310–0.740) | <b>1.23</b>  | (0.980–1.53)  | <b>2.19</b> | (1.61–3.07)  | <b>3.14</b> | (2.25–3.97)                | 821  | 71.8 |
|                    | 2003–2004    | *                      |               | <b>0.300</b>                                  | (<LOD–0.350)  | <b>0.640</b> | (0.560–0.730) | <b>1.49</b> | (1.16–1.60)  | <b>1.97</b> | (1.57–2.43)                | 689  | 51.7 |
| 20–59 years        | 1999–2000    | *                      |               | <b>0.490</b>                                  | (<LOD–0.670)  | <b>0.740</b> | (0.600–0.930) | <b>1.30</b> | (0.990–1.80) | <b>2.00</b> | (1.50–2.60)                | 814  | 52.3 |
|                    | 2001–2002    | <b>0.449</b>           | (0.340–0.592) | <b>0.540</b>                                  | (0.380–0.880) | <b>1.45</b>  | (1.19–1.79)   | <b>2.46</b> | (2.11–3.17)  | <b>3.83</b> | (2.96–5.34)                | 1122 | 67.8 |
|                    | 2003–2004    | *                      |               | <LOD                                          |               | <b>0.800</b> | (0.650–0.960) | <b>1.76</b> | (1.37–2.32)  | <b>3.65</b> | (2.31–3.89)                | 919  | 47.2 |
|                    | 1999–2000    | *                      |               | <b>0.250</b>                                  | (<LOD–0.460)  | <b>0.680</b> | (0.440–1.08)  | <b>1.79</b> | (1.08–2.39)  | <b>2.75</b> | (2.02–3.22)                | 814  | 52.3 |
|                    | 2001–2002    | <b>0.447</b>           | (0.335–0.597) | <b>0.490</b>                                  | (0.320–0.740) | <b>1.32</b>  | (0.990–1.71)  | <b>2.87</b> | (2.08–3.95)  | <b>4.69</b> | (3.20–8.71)                | 1122 | 67.8 |
|                    | 2003–2004    | *                      |               | <LOD                                          |               | <b>0.700</b> | (0.550–0.880) | <b>1.47</b> | (1.11–2.23)  | <b>3.82</b> | (2.02–3.80)                | 918  | 47.2 |
| 60 years and older | 2001–2002    | <b>0.662</b>           | (0.571–0.768) | <b>1.00</b>                                   | (0.740–1.19)  | <b>1.76</b>  | (1.50–2.10)   | <b>2.81</b> | (2.37–3.46)  | <b>4.45</b> | (2.95–8.31)                | 497  | 75.5 |
|                    | 2003–2004    | *                      |               | <b>0.220</b>                                  | (<LOD–0.430)  | <b>0.810</b> | (0.670–0.950) | <b>1.93</b> | (1.33–2.37)  | <b>3.27</b> | (2.06–4.91)                | 517  | 53.5 |
|                    | 2001–2002    | <b>0.821</b>           | (0.708–0.952) | <b>0.970</b>                                  | (0.850–1.10)  | <b>2.25</b>  | (1.81–2.66)   | <b>3.97</b> | (3.30–5.03)  | <b>5.51</b> | (4.79–7.46)                | 497  | 75.5 |
|                    | 2003–2004    | *                      |               | <b>0.460</b>                                  | (<LOD–0.520)  | <b>0.880</b> | (0.740–1.08)  | <b>1.97</b> | (1.36–2.87)  | <b>3.76</b> | (2.14–8.11)                | 517  | 53.5 |

Table 4. Cont.

|                       | Survey years | Geometric mean<br>(95% confidence limit) | Selected percentile<br>(95% confidence interval) |              |               |               | Sample size  | Weighted Detection Percent |             |             |             |      |      |
|-----------------------|--------------|------------------------------------------|--------------------------------------------------|--------------|---------------|---------------|--------------|----------------------------|-------------|-------------|-------------|------|------|
|                       |              |                                          | 50th                                             | 75th         | 90th          | 95th          |              |                            |             |             |             |      |      |
| <b>Sex</b>            |              |                                          |                                                  |              |               |               |              |                            |             |             |             |      |      |
| Males                 | 1999–2000    | *                                        | <b>0.510</b>                                     | (<LOD–0.700) | <b>0.790</b>  | (0.680–1.10)  | <b>1.50</b>  | (1.20–2.20)                | <b>2.70</b> | (1.90–4.10) | 952         | 56.4 |      |
|                       | 2001–2002    | <b>0.495</b>                             | (0.359–0.587)                                    | <b>0.570</b> | (0.390–0.860) | <b>1.50</b>   | (1.30–1.78)  | <b>2.54</b>                | (2.16–3.34) | <b>3.83</b> | (3.07–5.85) | 1187 | 70.8 |
|                       | 2003–2004    | *                                        | <b>&lt;LOD</b>                                   |              | <b>0.880</b>  | (0.720–1.01)  | <b>2.20</b>  | (1.54–2.50)                | <b>2.95</b> | (2.36–4.29) | 907         | 51.5 |      |
|                       | 1999–2000    | *                                        | <b>0.270</b>                                     | (<LOD–0.470) | <b>0.670</b>  | (0.520–0.840) | <b>1.34</b>  | (1.08–2.17)                | <b>2.67</b> | (1.67–3.23) | 952         | 56.4 |      |
|                       | 2001–2002    | <b>0.372</b>                             | (0.285–0.485)                                    | <b>0.460</b> | (0.270–0.690) | <b>1.11</b>   | (0.940–1.33) | <b>2.05</b>                | (1.55–3.11) | <b>3.38</b> | (2.47–4.71) | 1187 | 70.8 |
|                       | 2003–2004    | *                                        | <b>&lt;LOD</b>                                   |              | <b>0.590</b>  | (0.500–0.760) | <b>1.42</b>  | (0.950–2.07)               | <b>2.62</b> | (1.61–3.97) | 906         | 51.5 |      |
| Females               | 1999–2000    | *                                        | <b>&lt;LOD</b>                                   |              | <b>0.720</b>  | (0.570–1.00)  | <b>1.30</b>  | (0.910–1.60)               | <b>1.70</b> | (1.30–3.20) | 997         | 48.9 |      |
|                       | 2001–2002    | <b>0.455</b>                             | (0.336–0.618)                                    | <b>0.550</b> | (0.380–0.940) | <b>1.48</b>   | (1.14–1.89)  | <b>2.45</b>                | (2.11–3.35) | <b>3.94</b> | (2.68–5.49) | 1332 | 68.4 |
|                       | 2003–2004    | *                                        | <b>&lt;LOD</b>                                   |              | <b>0.780</b>  | (0.590–0.970) | <b>1.47</b>  | (1.22–2.00)                | <b>2.57</b> | (1.87–3.78) | 998         | 46.6 |      |
|                       | 1999–2000    | *                                        | <b>&lt;LOD</b>                                   |              | <b>0.790</b>  | (0.380–1.50)  | <b>1.89</b>  | (1.07–2.52)                | <b>2.52</b> | (1.89–3.75) | 997         | 48.9 |      |
|                       | 2001–2002    | <b>0.552</b>                             | (0.412–0.739)                                    | <b>0.580</b> | (0.370–0.910) | <b>1.60</b>   | (1.18–2.42)  | <b>3.70</b>                | (2.77–4.99) | <b>6.57</b> | (3.92–8.82) | 1331 | 68.4 |
|                       | 2003–2004    | *                                        | <b>&lt;LOD</b>                                   |              | <b>0.750</b>  | (0.660–0.900) | <b>1.50</b>  | (1.22–2.23)                | <b>2.60</b> | (2.08–3.98) | 997         | 46.6 |      |
| <b>Race/ethnicity</b> |              |                                          |                                                  |              |               |               |              |                            |             |             |             |      |      |
| Non-Hispanic whites   | 1999–2000    | *                                        | <b>0.160</b>                                     | (<LOD–0.700) | <b>0.740</b>  | (0.580–1.10)  | <b>1.30</b>  | (0.930–1.90)               | <b>1.90</b> | (1.50–2.80) | 595         | 50.1 |      |
|                       | 2001–2002    | <b>0.425</b>                             | (0.303–0.597)                                    | <b>0.510</b> | (0.280–0.930) | <b>1.46</b>   | (1.10–1.83)  | <b>2.41</b>                | (2.05–3.17) | <b>3.73</b> | (2.59–6.15) | 948  | 67.2 |
|                       | 2003–2004    | *                                        | <b>&lt;LOD</b>                                   |              | <b>0.710</b>  | (0.560–0.910) | <b>1.73</b>  | (1.29–2.31)                | <b>2.64</b> | (1.96–3.89) | 745         | 46.5 |      |

Table 4. Cont.

|                     | Survey years | Geometric mean         |               | Selected percentile (95% confidence interval) |               |              |               |             |              |             | Sample size | Weighted Detection Percent |      |
|---------------------|--------------|------------------------|---------------|-----------------------------------------------|---------------|--------------|---------------|-------------|--------------|-------------|-------------|----------------------------|------|
|                     |              | (95% confidence limit) |               | 50th                                          | 75th          | 90th         | 95th          |             |              |             |             |                            |      |
|                     | 1999–2000    | *                      |               | <b>0.230</b>                                  | (<LOD–0.550)  | <b>0.710</b> | (0.390–1.22)  | <b>1.88</b> | (1.05–2.58)  | <b>2.64</b> | (2.08–3.07) | 595                        | 50.1 |
|                     | 2001–2002    | <b>0.448</b>           | (0.318–0.630) | <b>0.510</b>                                  | (0.270–0.800) | <b>1.38</b>  | (1.00–1.88)   | <b>3.08</b> | (2.29–4.23)  | <b>5.77</b> | (3.42–8.44) | 948                        | 67.2 |
|                     | 2003–2004    | *                      |               | <b>&lt;LOD</b>                                |               | <b>0.700</b> | (0.560–0.840) | <b>1.45</b> | (1.06–2.08)  | <b>3.27</b> | (1.73–3.97) | 744                        | 46.5 |
| Mexican Americans   | 1999–2000    | *                      |               | <b>0.560</b>                                  | (<LOD–0.780)  | <b>0.840</b> | (0.740–0.980) | <b>1.50</b> | (1.20–1.90)  | <b>2.20</b> | (2.00–2.90) | 672                        | 56.7 |
|                     | 2001–2002    | <b>0.549</b>           | (0.398–0.759) | <b>0.710</b>                                  | (0.460–0.960) | <b>1.40</b>  | (1.01–1.98)   | <b>2.63</b> | (1.98–3.47)  | <b>3.98</b> | (2.74–5.21) | 678                        | 77.5 |
|                     | 2003–2004    | *                      |               | <b>0.240</b>                                  | (<LOD–0.380)  | <b>0.960</b> | (0.680–1.54)  | <b>2.22</b> | (1.46–3.83)  | <b>3.97</b> | (2.22–8.80) | 478                        | 51.2 |
|                     | 1999–2000    | *                      |               | <b>0.330</b>                                  | (<LOD–0.790)  | <b>0.830</b> | (0.550–1.20)  | <b>1.69</b> | (1.20–2.43)  | <b>2.71</b> | (1.75–3.78) | 672                        | 56.7 |
|                     | 2001–2002    | <b>0.509</b>           | (0.390–0.693) | <b>0.560</b>                                  | (0.380–0.840) | <b>1.28</b>  | (1.03–1.67)   | <b>2.55</b> | (1.77–3.72)  | <b>3.72</b> | (2.58–6.30) | 678                        | 77.5 |
|                     | 2003–2004    | *                      |               | <b>0.310</b>                                  | (<LOD–0.390)  | <b>0.750</b> | (0.480–1.22)  | <b>1.92</b> | (1.22–3.43)  | <b>3.66</b> | (2.02–6.17) | 478                        | 51.2 |
| Non-Hispanic blacks | 1999–2000    | <b>0.343</b>           | (0.201–0.584) | <b>0.570</b>                                  | (<LOD–0.750)  | <b>0.820</b> | (0.690–1.20)  | <b>1.80</b> | (1.30–3.20)  | <b>3.60</b> | (2.00–4.80) | 509                        | 62   |
|                     | 2001–2002    | <b>0.749</b>           | (0.592–0.949) | <b>1.18</b>                                   | (0.740–1.49)  | <b>1.86</b>  | (1.77–2.03)   | <b>3.55</b> | (3.01–3.91)  | <b>5.27</b> | (3.89–6.74) | 695                        | 78   |
|                     | 2003–2004    | <b>0.467</b>           | (0.382–0.570) | <b>0.450</b>                                  | (<LOD–0.730)  | <b>1.09</b>  | (0.930–1.26)  | <b>2.32</b> | (1.59–2.88)  | <b>3.26</b> | (2.41–5.46) | 553                        | 60   |
|                     | 1999–2000    | <b>0.234</b>           | (0.136–0.403) | <b>0.310</b>                                  | (<LOD–0.580)  | <b>0.720</b> | (0.510–0.850) | <b>1.39</b> | (1.03–2.10)  | <b>2.91</b> | (1.49–4.24) | 509                        | 62   |
|                     | 2001–2002    | <b>0.535</b>           | (0.444–0.645) | <b>0.710</b>                                  | (0.550–0.920) | <b>1.43</b>  | (1.32–1.60)   | <b>2.73</b> | (2.30–2.98)  | <b>4.00</b> | (3.05–4.99) | 694                        | 78   |
|                     | 2003–2004    | <b>0.305</b>           | (0.253–0.368) | <b>0.280</b>                                  | (<LOD–0.380)  | <b>0.640</b> | (0.540–0.820) | <b>1.41</b> | (0.930–1.79) | <b>2.13</b> | (1.38–3.90) | 552                        | 60   |

<LOD means less than the limit of detection.

\* Not calculated. Proportion of results below limit of detection was too high to provide a valid result.

**Table 5.** Dimethyldithiophosphate. Geometric mean and selected percentiles of urine concentrations for the U.S. population from the National Health and Nutrition Examination Surveys. Units are µg/L for unshaded values and µg/g creatinine for shaded values.

|                  | Survey years | Geometric mean<br>(95% confidence limit) | Selected percentile<br>( 95% confidence interval) |              |               |             | Sample size | Weighted Detection Percent |             |             |             |     |      |
|------------------|--------------|------------------------------------------|---------------------------------------------------|--------------|---------------|-------------|-------------|----------------------------|-------------|-------------|-------------|-----|------|
|                  |              |                                          | 50th                                              | 75th         | 90th          | 95th        |             |                            |             |             |             |     |      |
| <b>Total</b>     | 1999–2000    | *                                        | <LOD                                              | <b>2.30</b>  | (1.30–3.90)   | <b>13.0</b> | (5.00–17.0) | <b>19.0</b>                | (17.0–38.0) | 1949        | 49.2        |     |      |
|                  | 2001–2002    | *                                        | <LOD                                              | <b>0.890</b> | (0.210–1.30)  | <b>2.49</b> | (1.88–3.40) | <b>5.10</b>                | (3.55–8.35) | 2518        | 32.7        |     |      |
|                  | 2003–2004    | *                                        | <LOD                                              | <b>0.640</b> | (0.480–0.800) | <b>1.99</b> | (1.38–3.30) | <b>5.05</b>                | (3.30–7.16) | 1930        | 39          |     |      |
|                  | 1999–2000    | *                                        | <LOD                                              | <b>1.88</b>  | (0.970–3.86)  | <b>10.1</b> | (5.31–18.3) | <b>21.7</b>                | (12.8–33.7) | 1949        | 49.2        |     |      |
|                  | 2001–2002    | *                                        | <LOD                                              | <b>0.670</b> | (0.330–1.08)  | <b>2.60</b> | (1.85–3.69) | <b>5.83</b>                | (4.23–7.75) | 2517        | 32.7        |     |      |
|                  | 2003–2004    | *                                        | <LOD                                              | <b>0.500</b> | (0.340–0.650) | <b>2.14</b> | (1.21–3.18) | <b>5.27</b>                | (2.69–7.61) | 1927        | 39          |     |      |
| <b>Age group</b> |              |                                          |                                                   |              |               |             |             |                            |             |             |             |     |      |
| 6–11 years       | 1999–2000    | <b>0.691</b>                             | (0.425–1.12)                                      | <b>0.740</b> | (0.080–1.80)  | <b>4.30</b> | (2.40–8.60) | <b>17.0</b>                | (6.90–37.0) | <b>32.0</b> | (17.0–44.0) | 471 | 60.8 |
|                  | 2001–2002    | *                                        | <LOD                                              | <b>1.30</b>  | (0.750–2.11)  | <b>3.53</b> | (2.20–4.50) | <b>7.33</b>                | (4.32–9.74) | 575         | 38.9        |     |      |
|                  | 2003–2004    | *                                        | <LOD                                              | <b>0.900</b> | (0.620–1.14)  | <b>2.94</b> | (1.14–5.48) | <b>5.48</b>                | (2.94–8.53) | 306         | 48.5        |     |      |
|                  | 1999–2000    | <b>0.748</b>                             | (0.474–1.18)                                      | <b>0.790</b> | (0.190–1.60)  | <b>4.07</b> | (2.31–7.18) | <b>16.2</b>                | (8.22–27.0) | <b>30.8</b> | (20.2–38.9) | 471 | 60.8 |
|                  | 2001–2002    | *                                        | <LOD                                              | <b>1.36</b>  | (0.800–2.31)  | <b>4.10</b> | (2.67–6.24) | <b>6.98</b>                | (4.40–12.8) | 575         | 38.9        |     |      |
|                  | 2003–2004    | *                                        | <LOD                                              | <b>0.960</b> | (0.580–1.57)  | <b>3.38</b> | (2.28–6.15) | <b>7.12</b>                | (4.38–7.55) | 306         | 48.5        |     |      |

Table 5. Cont.

|                    | Survey years | Geometric mean<br>(95% confidence limit) | Selected percentile<br>(95% confidence interval) |              |               |             |              |             |             | Sample size | Weighted Detection Percent |
|--------------------|--------------|------------------------------------------|--------------------------------------------------|--------------|---------------|-------------|--------------|-------------|-------------|-------------|----------------------------|
|                    |              |                                          | 50th                                             | 75th         | 90th          | 95th        |              |             |             |             |                            |
| 12–19 years        | 1999–2000    | *                                        | <LOD                                             | <b>2.30</b>  | (1.40–4.50)   | <b>13.0</b> | (5.40–20.0)  | <b>20.0</b> | (17.0–38.0) | 664         | 48.8                       |
|                    | 2001–2002    | *                                        | <LOD                                             | <b>0.830</b> | (0.400–1.14)  | <b>2.52</b> | (1.85–3.07)  | <b>4.63</b> | (3.59–5.83) | 821         | 31.3                       |
|                    | 2003–2004    | *                                        | <LOD                                             | <b>0.580</b> | (0.350–0.770) | <b>1.46</b> | (1.12–1.99)  | <b>2.67</b> | (1.82–4.49) | 699         | 36.7                       |
|                    | 1999–2000    | *                                        | <LOD                                             | <b>1.52</b>  | (0.620–3.47)  | <b>9.48</b> | (4.04–16.8)  | <b>21.5</b> | (9.48–42.3) | 664         | 48.8                       |
|                    | 2001–2002    | *                                        | <LOD                                             | <b>0.540</b> | (0.310–0.770) | <b>2.02</b> | (1.49–2.40)  | <b>3.13</b> | (2.51–4.67) | 820         | 31.3                       |
|                    | 2003–2004    | *                                        | <LOD                                             | <b>0.360</b> | (0.240–0.580) | <b>1.02</b> | (0.630–1.57) | <b>2.45</b> | (1.33–3.39) | 697         | 36.7                       |
| 20–59 years        | 1999–2000    | *                                        | <LOD                                             | <b>2.10</b>  | (0.840–3.60)  | <b>11.0</b> | (4.00–17.0)  | <b>17.0</b> | (7.70–50.0) | 814         | 47.3                       |
|                    | 2001–2002    | *                                        | <LOD                                             | <b>0.840</b> | (<LOD–1.31)   | <b>2.32</b> | (1.70–3.40)  | <b>4.90</b> | (2.90–9.52) | 1122        | 30.8                       |
|                    | 2003–2004    | *                                        | <LOD                                             | <b>0.610</b> | (0.350–0.800) | <b>2.00</b> | (1.36–3.63)  | <b>5.07</b> | (3.62–8.62) | 925         | 35.8                       |
|                    | 1999–2000    | *                                        | <LOD                                             | <b>1.71</b>  | (0.850–3.56)  | <b>8.50</b> | (4.00–19.1)  | <b>20.5</b> | (8.57–40.7) | 814         | 47.3                       |
|                    | 2001–2002    | *                                        | <LOD                                             | <b>0.600</b> | (<LOD–1.05)   | <b>2.56</b> | (1.64–4.03)  | <b>6.33</b> | (3.96–8.17) | 1122        | 30.8                       |
|                    | 2003–2004    | *                                        | <LOD                                             | <b>0.450</b> | (0.340–0.580) | <b>2.17</b> | (1.10–3.64)  | <b>5.71</b> | (2.47–10.1) | 924         | 35.8                       |
| 60 years and older | 2001–2002    | *                                        | <LOD                                             | <b>1.02</b>  | (0.540–1.37)  | <b>3.54</b> | (2.58–5.96)  | <b>7.89</b> | (5.09–16.1) | 497         | 37.3                       |
|                    | 2003–2004    | *                                        | <LOD                                             | <b>1.04</b>  | (0.580–2.07)  | <b>3.35</b> | (2.06–11.3)  | <b>11.3</b> | (3.14–30.1) | 528         | 46.6                       |
|                    | 2001–2002    | *                                        | <LOD                                             | <b>1.10</b>  | (0.630–1.85)  | <b>4.89</b> | (3.36–7.82)  | <b>13.4</b> | (6.98–19.8) | 497         | 37.3                       |
|                    | 2003–2004    | *                                        | <LOD                                             | <b>1.19</b>  | (0.590–1.91)  | <b>5.03</b> | (2.16–13.0)  | <b>13.0</b> | (4.45–23.0) | 528         | 46.6                       |

Table 5. Cont.

|                       | Survey years | Geometric mean<br>(95% confidence limit) | Selected percentile<br>(95% confidence interval) |                            |                          |                         |      |      |  | Sample size | Weighted Detection Percent |
|-----------------------|--------------|------------------------------------------|--------------------------------------------------|----------------------------|--------------------------|-------------------------|------|------|--|-------------|----------------------------|
|                       |              |                                          | 50th                                             | 75th                       | 90th                     | 95th                    |      |      |  |             |                            |
| <b>Sex</b>            |              |                                          |                                                  |                            |                          |                         |      |      |  |             |                            |
| Males                 | 1999–2000    | *                                        | <b>0.110</b> (<LOD–0.610)                        | <b>2.30</b> (1.20–4.90)    | <b>16.0</b> (5.70–17.0)  | <b>19.0</b> (17.0–38.0) | 952  | 49.4 |  |             |                            |
|                       | 2001–2002    | *                                        | <LOD                                             | <b>0.840</b> (0.190–1.28)  | <b>2.40</b> (1.83–3.28)  | <b>5.13</b> (3.53–7.86) | 1187 | 33.4 |  |             |                            |
|                       | 2003–2004    | *                                        | <LOD                                             | <b>0.600</b> (0.260–0.910) | <b>1.76</b> (1.07–3.35)  | <b>4.45</b> (2.24–7.97) | 935  | 37.5 |  |             |                            |
|                       | 1999–2000    | *                                        | <b>0.150</b> (<LOD–0.370)                        | <b>1.79</b> (0.840–3.97)   | <b>11.0</b> (4.62–17.4)  | <b>18.1</b> (7.51–44.7) | 952  | 49.4 |  |             |                            |
|                       | 2001–2002    | *                                        | <LOD                                             | <b>0.580</b> (0.270–0.820) | <b>2.01</b> (1.40–2.67)  | <b>4.67</b> (2.90–6.80) | 1187 | 33.4 |  |             |                            |
|                       | 2003–2004    | *                                        | <LOD                                             | <b>0.370</b> (0.260–0.590) | <b>1.57</b> (0.730–3.32) | <b>3.74</b> (2.14–6.53) | 934  | 37.5 |  |             |                            |
|                       | 1999–2000    | *                                        | <LOD                                             | <b>2.20</b> (1.10–3.90)    | <b>11.0</b> (4.20–17.0)  | <b>20.0</b> (13.0–40.0) | 997  | 48.9 |  |             |                            |
|                       | 2001–2002    | *                                        | <LOD                                             | <b>0.960</b> (0.170–1.39)  | <b>2.52</b> (1.94–3.68)  | <b>5.10</b> (3.31–10.6) | 1331 | 32   |  |             |                            |
|                       | 2003–2004    | *                                        | <LOD                                             | <b>0.690</b> (0.510–0.850) | <b>2.40</b> (1.43–4.15)  | <b>5.07</b> (3.35–10.3) | 995  | 40.5 |  |             |                            |
| Females               | 1999–2000    | *                                        | <LOD                                             | <b>2.06</b> (0.940–4.00)   | <b>9.30</b> (4.96–25.5)  | <b>27.0</b> (9.66–47.5) | 997  | 48.9 |  |             |                            |
|                       | 2001–2002    | *                                        | <LOD                                             | <b>0.820</b> (0.370–1.43)  | <b>2.92</b> (2.29–4.56)  | <b>7.73</b> (4.44–11.9) | 1330 | 32   |  |             |                            |
|                       | 2003–2004    | *                                        | <LOD                                             | <b>0.560</b> (0.390–0.790) | <b>2.62</b> (1.33–4.41)  | <b>5.88</b> (2.82–11.6) | 993  | 40.5 |  |             |                            |
|                       | 1999–2000    | *                                        | <LOD                                             | <b>2.00</b> (0.800–4.00)   | <b>13.0</b> (3.90–20.0)  | <b>20.0</b> (16.0–40.0) | 595  | 47.2 |  |             |                            |
|                       | 2001–2002    | *                                        | <LOD                                             | <b>0.960</b> (LOD–1.42)    | <b>2.49</b> (1.83–3.65)  | <b>5.74</b> (3.28–9.87) | 947  | 32.6 |  |             |                            |
|                       | 2003–2004    | *                                        | <LOD                                             | <b>0.640</b> (0.380–0.880) | <b>1.96</b> (1.21–3.87)  | <b>5.05</b> (2.29–10.6) | 752  | 39.4 |  |             |                            |
| <b>Race/ethnicity</b> |              |                                          |                                                  |                            |                          |                         |      |      |  |             |                            |
| Non-Hispanic whites   | 1999–2000    | *                                        | <LOD                                             | <b>2.00</b> (0.800–4.00)   | <b>13.0</b> (3.90–20.0)  | <b>20.0</b> (16.0–40.0) | 595  | 47.2 |  |             |                            |
|                       | 2001–2002    | *                                        | <LOD                                             | <b>0.960</b> (LOD–1.42)    | <b>2.49</b> (1.83–3.65)  | <b>5.74</b> (3.28–9.87) | 947  | 32.6 |  |             |                            |
|                       | 2003–2004    | *                                        | <LOD                                             | <b>0.640</b> (0.380–0.880) | <b>1.96</b> (1.21–3.87)  | <b>5.05</b> (2.29–10.6) | 752  | 39.4 |  |             |                            |



Table 5. Cont.

|                     | Survey years | Geometric mean<br>(95% confidence limit) | Selected percentile<br>(95% confidence interval) |              |               |               |              | Sample size  | Weighted Detection Percent |             |      |      |
|---------------------|--------------|------------------------------------------|--------------------------------------------------|--------------|---------------|---------------|--------------|--------------|----------------------------|-------------|------|------|
|                     |              |                                          | 50th                                             | 75th         | 90th          | 95th          |              |              |                            |             |      |      |
|                     | 1999–2000    | *                                        | <LOD                                             | <b>1.77</b>  | (0.780–4.02)  | <b>11.4</b>   | (4.07–21.5)  | <b>21.5</b>  | (11.4–34.8)                | 595         | 47.2 |      |
|                     | 2001–2002    | *                                        | <LOD                                             | <b>0.710</b> | (<LOD–1.31)   | <b>2.85</b>   | (1.91–4.96)  | <b>7.29</b>  | (4.25–9.47)                | 947         | 32.6 |      |
|                     | 2003–2004    | *                                        | <LOD                                             | <b>0.470</b> | (0.340–0.700) | <b>2.25</b>   | (1.02–4.03)  | <b>5.89</b>  | (2.47–10.1)                | 751         | 39.4 |      |
| Mexican Americans   | 1999–2000    | *                                        | <b>0.250</b>                                     | (<LOD–0.870) | <b>1.90</b>   | (1.10–3.00)   | <b>5.80</b>  | (4.10–9.70)  | <b>12.0</b>                | (5.90–28.0) | 672  | 52.5 |
|                     | 2001–2002    | *                                        | <LOD                                             |              | <b>1.03</b>   | (0.750–1.37)  | <b>2.67</b>  | (2.07–3.42)  | <b>4.47</b>                | (3.70–7.01) | 678  | 37.6 |
|                     | 2003–2004    | *                                        | <LOD                                             |              | <b>0.730</b>  | (0.360–1.21)  | <b>2.07</b>  | (1.36–3.15)  | <b>5.26</b>                | (2.30–6.99) | 498  | 41.8 |
|                     | 1999–2000    | *                                        | <b>0.270</b>                                     | (<LOD–0.660) | <b>1.35</b>   | (0.860–2.53)  | <b>6.55</b>  | (3.83–11.8)  | <b>16.7</b>                | (6.25–38.8) | 672  | 52.5 |
|                     | 2001–2002    | *                                        | <LOD                                             |              | <b>0.830</b>  | (0.540–1.11)  | <b>2.59</b>  | (1.88–3.22)  | <b>4.86</b>                | (3.22–6.37) | 678  | 37.6 |
|                     | 2003–2004    | *                                        | <LOD                                             |              | <b>0.650</b>  | (0.320–1.10)  | <b>2.04</b>  | (1.09–3.84)  | <b>4.50</b>                | (2.11–5.88) | 497  | 41.8 |
| Non-Hispanic blacks | 1999–2000    | *                                        | <b>0.330</b>                                     | (<LOD–1.20)  | <b>3.20</b>   | (1.40–7.00)   | <b>14.0</b>  | (5.70–30.0)  | <b>19.0</b>                | (17.0–39.0) | 509  | 53.6 |
|                     | 2001–2002    | *                                        | <LOD                                             |              | <b>0.770</b>  | (<LOD–1.67)   | <b>2.11</b>  | (1.55–4.18)  | <b>4.39</b>                | (2.51–8.66) | 695  | 30.8 |
|                     | 2003–2004    | *                                        | <LOD                                             |              | <b>0.590</b>  | (0.370–0.720) | <b>1.61</b>  | (1.05–3.11)  | <b>4.51</b>                | (2.23–6.97) | 552  | 36.6 |
|                     | 1999–2000    | *                                        | <b>0.250</b>                                     | (<LOD–0.700) | <b>2.40</b>   | (0.690–5.44)  | <b>9.41</b>  | (4.81–17.8)  | <b>17.9</b>                | (11.5–40.7) | 509  | 53.6 |
|                     | 2001–2002    | *                                        | <LOD                                             |              | <b>0.430</b>  | (<LOD–0.930)  | <b>1.80</b>  | (0.830–3.50) | <b>3.65</b>                | (2.33–5.91) | 694  | 30.8 |
|                     | 2003–2004    | *                                        | <LOD                                             |              | <b>0.340</b>  | (0.260–0.430) | <b>0.890</b> | (0.740–1.50) | <b>2.33</b>                | (1.12–4.55) | 551  | 36.6 |

<LOD means less than the limit of detection.

\* Not calculated. Proportion of results below limit of detection was too high to provide a valid result.

**Table 6.** Diethyldithiophosphate. Geometric mean and selected percentiles of urine concentrations for the U.S. population from the National Health and Nutrition Examination Surveys. Units are µg/L for unshaded values and µg/g creatinine for shaded values.

|                  | Survey years | Geometric mean<br>(95% confidence limit) | Selected percentile<br>( 95% confidence interval) |              |              |               |              | Sample size   | Weighted Detection Percent |               |      |      |
|------------------|--------------|------------------------------------------|---------------------------------------------------|--------------|--------------|---------------|--------------|---------------|----------------------------|---------------|------|------|
|                  |              |                                          | 50th                                              | 75th         | 90th         | 95th          |              |               |                            |               |      |      |
| <b>Total</b>     | 1999–2000    | *                                        | <b>0.090</b>                                      | (<LOD–0.140) | <b>0.210</b> | (0.140–0.290) | <b>0.470</b> | (0.380–0.640) | <b>0.870</b>               | (0.640–1.10)  | 1949 | 54.7 |
|                  | 2001–2002    | *                                        | <LOD                                              |              | <LOD         |               | <b>0.610</b> | (0.410–0.770) | <b>0.850</b>               | (0.700–1.30)  | 2516 | 18.7 |
|                  | 2003–2004    | *                                        | <LOD                                              |              | <LOD         |               | <LOD         |               | <b>0.320</b>               | (0.170–0.540) | 1965 | 7.91 |
|                  | 1999–2000    | *                                        | <b>0.070</b>                                      | (<LOD–0.110) | <b>0.200</b> | (0.140–0.290) | <b>0.550</b> | (0.390–0.700) | <b>0.860</b>               | (0.670–1.14)  | 1949 | 54.7 |
|                  | 2001–2002    | *                                        | <LOD                                              |              | <LOD         |               | <b>0.580</b> | (0.390–0.750) | <b>1.01</b>                | (0.710–1.43)  | 2515 | 18.7 |
|                  | 2003–2004    | *                                        | <LOD                                              |              | <LOD         |               | <LOD         |               | <b>0.410</b>               | (0.330–0.510) | 1962 | 7.91 |
| <b>Age group</b> |              |                                          |                                                   |              |              |               |              |               |                            |               |      |      |
| 6–11 years       | 1999–2000    | *                                        | <b>0.090</b>                                      | (<LOD–0.160) | <b>0.190</b> | (0.130–0.280) | <b>0.430</b> | (0.300–0.650) | <b>0.850</b>               | (0.470–1.00)  | 471  | 58.5 |
|                  | 2001–2002    | *                                        | <LOD                                              |              | <LOD         |               | <b>0.630</b> | (0.380–0.870) | <b>0.940</b>               | (0.690–1.42)  | 576  | 20.4 |
|                  | 2003–2004    | *                                        | <LOD                                              |              | <LOD         |               | <LOD         |               | <b>0.540</b>               | (<LOD–0.650)  | 310  | 8.47 |
|                  | 1999–2000    | *                                        | <b>0.100</b>                                      | (<LOD–0.140) | <b>0.190</b> | (0.150–0.270) | <b>0.570</b> | (0.410–0.760) | <b>1.03</b>                | (0.570–1.58)  | 471  | 58.5 |
|                  | 2001–2002    | *                                        | <LOD                                              |              | <LOD         |               | <b>0.780</b> | (0.610–1.12)  | <b>1.36</b>                | (1.02–1.86)   | 576  | 20.4 |
|                  | 2003–2004    | *                                        | <LOD                                              |              | <LOD         |               | <LOD         |               | <b>0.470</b>               | (<LOD–0.970)  | 310  | 8.47 |

Table 6. Cont.

|                    | Survey years | Geometric mean<br>(95% confidence limit) | Selected percentile<br>(95% confidence interval) |              |              |               |              |               |              |               | Sample size | Weighted Detection Percent |
|--------------------|--------------|------------------------------------------|--------------------------------------------------|--------------|--------------|---------------|--------------|---------------|--------------|---------------|-------------|----------------------------|
|                    |              |                                          | 50th                                             | 75th         | 90th         | 95th          |              |               |              |               |             |                            |
| 12–19 years        | 1999–2000    | *                                        | <b>0.080</b>                                     | (<LOD–0.180) | <b>0.260</b> | (0.120–0.350) | <b>0.640</b> | (0.420–0.840) | <b>0.930</b> | (0.720–1.30)  | 664         | 53.1                       |
|                    | 2001–2002    | *                                        | <LOD                                             |              | <LOD         |               | <b>0.560</b> | (0.330–0.730) | <b>0.820</b> | (0.610–0.990) | 822         | 17.3                       |
|                    | 2003–2004    | *                                        | <LOD                                             |              | <LOD         |               | <b>0.150</b> | (<LOD–0.350)  | <b>0.450</b> | (0.370–0.570) | 717         | 11.1                       |
|                    | 1999–2000    | *                                        | <b>0.050</b>                                     | (<LOD–0.080) | <b>0.170</b> | (0.100–0.220) | <b>0.440</b> | (0.230–0.730) | <b>0.730</b> | (0.380–1.09)  | 664         | 53.1                       |
|                    | 2001–2002    | *                                        | <LOD                                             |              | <LOD         |               | <b>0.360</b> | (0.250–0.540) | <b>0.670</b> | (0.380–0.990) | 821         | 17.3                       |
|                    | 2003–2004    | *                                        | <LOD                                             |              | <LOD         |               | <b>0.230</b> | (<LOD–0.260)  | <b>0.330</b> | (0.240–0.600) | 715         | 11.1                       |
| 20–59 years        | 1999–2000    | *                                        | <b>0.090</b>                                     | (<LOD–0.130) | <b>0.210</b> | (0.130–0.290) | <b>0.450</b> | (0.360–0.640) | <b>0.900</b> | (0.610–1.10)  | 814         | 54.4                       |
|                    | 2001–2002    | *                                        | <LOD                                             |              | <LOD         |               | <b>0.620</b> | (0.430–0.770) | <b>0.830</b> | (0.700–1.32)  | 1118        | 18.8                       |
|                    | 2003–2004    | *                                        | <LOD                                             |              | <LOD         |               | <LOD         |               | <b>0.220</b> | (<LOD–0.580)  | 938         | 7.51                       |
|                    | 1999–2000    | *                                        | <b>0.080</b>                                     | (<LOD–0.110) | <b>0.210</b> | (0.140–0.310) | <b>0.550</b> | (0.360–0.730) | <b>0.860</b> | (0.650–1.20)  | 814         | 54.4                       |
|                    | 2001–2002    | *                                        | <LOD                                             |              | <LOD         |               | <b>0.580</b> | (0.380–0.740) | <b>1.03</b>  | (0.700–1.60)  | 1118        | 18.8                       |
|                    | 2003–2004    | *                                        | <LOD                                             |              | <LOD         |               | <LOD         |               | <b>0.400</b> | (<LOD–0.540)  | 937         | 7.51                       |
| 60 years and older | 2001–2002    | *                                        | <LOD                                             |              | <LOD         |               | <b>0.630</b> | (0.360–1.08)  | <b>1.10</b>  | (0.610–1.41)  | 497         | 18.5                       |
|                    | 2003–2004    | *                                        | <LOD                                             |              | <LOD         |               | <LOD         |               | <LOD         |               | 529         | 6.72                       |
|                    | 2001–2002    | *                                        | <LOD                                             |              | <LOD         |               | <b>0.810</b> | (0.370–1.28)  | <b>1.44</b>  | (0.830–2.61)  | 497         | 18.5                       |
|                    | 2003–2004    | *                                        | <LOD                                             |              | <LOD         |               | <LOD         |               | <LOD         |               | 529         | 6.72                       |

Table 6. Cont.

|                       | Survey years | Geometric mean<br>(95% confidence limit) | Selected percentile<br>(95% confidence interval) |              |              |               |              |               |              | Sample size   | Weighted Detection Percent |      |
|-----------------------|--------------|------------------------------------------|--------------------------------------------------|--------------|--------------|---------------|--------------|---------------|--------------|---------------|----------------------------|------|
|                       |              |                                          | 50th                                             | 75th         | 90th         | 95th          |              |               |              |               |                            |      |
| <b>Sex</b>            |              |                                          |                                                  |              |              |               |              |               |              |               |                            |      |
| Males                 | 1999–2000    | *                                        | <b>0.090</b>                                     | (<LOD–0.150) | <b>0.220</b> | (0.140–0.310) | <b>0.490</b> | (0.380–0.680) | <b>0.870</b> | (0.680–1.10)  | 952                        | 56   |
|                       | 2001–2002    | *                                        | <LOD                                             |              | <LOD         |               | <b>0.600</b> | (0.370–0.740) | <b>0.770</b> | (0.680–1.03)  | 1187                       | 18.8 |
|                       | 2003–2004    | *                                        | <LOD                                             |              | <LOD         |               | <LOD         |               | <b>0.390</b> | (0.130–0.540) | 946                        | 7.99 |
|                       | 1999–2000    | *                                        | <b>0.070</b>                                     | (<LOD–0.110) | <b>0.190</b> | (0.140–0.230) | <b>0.410</b> | (0.340–0.500) | <b>0.720</b> | (0.520–0.940) | 952                        | 56   |
|                       | 2001–2002    | *                                        | <LOD                                             |              | <LOD         |               | <b>0.380</b> | (0.300–0.650) | <b>0.740</b> | (0.580–1.03)  | 1187                       | 18.8 |
|                       | 2003–2004    | *                                        | <LOD                                             |              | <LOD         |               | <LOD         |               | <b>0.330</b> | (0.260–0.410) | 945                        | 7.99 |
|                       | 1999–2000    | *                                        | <b>0.090</b>                                     | (<LOD–0.130) | <b>0.190</b> | (0.110–0.310) | <b>0.460</b> | (0.320–0.840) | <b>0.870</b> | (0.440–1.40)  | 997                        | 53.4 |
|                       | 2001–2002    | *                                        | <LOD                                             |              | <LOD         |               | <b>0.660</b> | (0.460–0.850) | <b>0.990</b> | (0.700–1.42)  | 1329                       | 18.6 |
|                       | 2003–2004    | *                                        | <LOD                                             |              | <LOD         |               | <LOD         |               | <b>0.240</b> | (<LOD–0.700)  | 1019                       | 7.84 |
| Females               | 1999–2000    | *                                        | <b>0.090</b>                                     | (<LOD–0.120) | <b>0.220</b> | (0.140–0.360) | <b>0.670</b> | (0.410–0.870) | <b>0.890</b> | (0.660–1.62)  | 997                        | 53.4 |
|                       | 2001–2002    | *                                        | <LOD                                             |              | <LOD         |               | <b>0.700</b> | (0.490–1.00)  | <b>1.24</b>  | (0.800–1.86)  | 1328                       | 18.6 |
|                       | 2003–2004    | *                                        | <LOD                                             |              | <LOD         |               | <LOD         |               | <b>0.500</b> | (<LOD–0.640)  | 1017                       | 7.84 |
|                       | 1999–2000    | *                                        | <b>0.080</b>                                     | (<LOD–0.160) | <b>0.190</b> | (0.120–0.290) | <b>0.450</b> | (0.310–0.720) | <b>0.870</b> | (0.510–1.30)  | 595                        | 51.9 |
|                       | 2001–2002    | *                                        | <LOD                                             |              | <LOD         |               | <b>0.610</b> | (0.360–0.780) | <b>0.830</b> | (0.650–1.36)  | 947                        | 17.4 |
|                       | 2003–2004    | *                                        | <LOD                                             |              | <LOD         |               | <LOD         |               | <b>0.290</b> | (<LOD–0.540)  | 757                        | 7.58 |
| <b>Race/ethnicity</b> |              |                                          |                                                  |              |              |               |              |               |              |               |                            |      |
| Non-Hispanic whites   | 1999–2000    | *                                        | <b>0.080</b>                                     | (<LOD–0.160) | <b>0.190</b> | (0.120–0.290) | <b>0.450</b> | (0.310–0.720) | <b>0.870</b> | (0.510–1.30)  | 595                        | 51.9 |
|                       | 2001–2002    | *                                        | <LOD                                             |              | <LOD         |               | <b>0.610</b> | (0.360–0.780) | <b>0.830</b> | (0.650–1.36)  | 947                        | 17.4 |
|                       | 2003–2004    | *                                        | <LOD                                             |              | <LOD         |               | <LOD         |               | <b>0.290</b> | (<LOD–0.540)  | 757                        | 7.58 |

Table 6. Cont.

|                     | Survey years | Geometric mean<br>(95% confidence limit) | Selected percentile<br>(95% confidence interval) |              |               |               |               |               |               |               | Sample size  | Weighted Detection Percent |      |
|---------------------|--------------|------------------------------------------|--------------------------------------------------|--------------|---------------|---------------|---------------|---------------|---------------|---------------|--------------|----------------------------|------|
|                     |              |                                          | 50th                                             | 75th         | 90th          | 95th          | 50th          | 75th          | 90th          | 95th          |              |                            |      |
|                     | 1999–2000    | *                                        | <b>0.070</b>                                     | (<LOD–0.120) | <b>0.200</b>  | (0.140–0.310) | <b>0.560</b>  | (0.380–0.730) | <b>0.880</b>  | (0.600–1.38)  | 595          | 51.9                       |      |
|                     | 2001–2002    | *                                        | <LOD                                             |              | <LOD          |               | <b>0.540</b>  | (0.360–0.780) | <b>1.03</b>   | (0.640–1.67)  | 947          | 17.4                       |      |
|                     | 2003–2004    | *                                        | <LOD                                             |              | <LOD          |               | <LOD          |               | <b>0.370</b>  | (<LOD–0.520)  | 756          | 7.58                       |      |
| Mexican Americans   | 1999–2000    | <b>0.130</b>                             | (<LOD–0.171)                                     | <b>0.100</b> | (0.060–0.190) | <b>0.310</b>  | (0.230–0.390) | <b>0.650</b>  | (0.520–0.860) | <b>1.10</b>   | (0.790–1.30) | 672                        | 63.4 |
|                     | 2001–2002    | *                                        | <LOD                                             |              | <LOD          |               | (<LOD–0.520)  | <b>0.700</b>  | (0.410–1.12)  | <b>1.11</b>   | (0.700–1.58) | 763                        | 24.7 |
|                     | 2003–2004    | *                                        | <LOD                                             |              | <LOD          |               | <LOD          |               | <b>0.170</b>  | (<LOD–0.600)  | 610          | 11.6                       |      |
|                     | 1999–2000    | <b>0.116</b>                             | (0.084–0.161)                                    | <b>0.090</b> | (0.060–0.170) | <b>0.300</b>  | (0.190–0.410) | <b>0.810</b>  | (0.570–0.990) | <b>1.19</b>   | (0.860–2.66) | 672                        | 63.4 |
|                     | 2001–2002    | *                                        | <LOD                                             |              | <LOD          |               | (0.440–1.24)  | <b>0.850</b>  | <b>1.29</b>   | (0.880–1.78)  | 678          | 24.7                       |      |
|                     | 2003–2004    | *                                        | <LOD                                             |              | <LOD          |               | (<LOD–0.450)  | <b>0.320</b>  | <b>0.540</b>  | (0.330–0.940) | 497          | 11.6                       |      |
| Non-Hispanic blacks | 1999–2000    | *                                        | <b>0.090</b>                                     | (<LOD–0.170) | <b>0.270</b>  | (0.140–0.400) | <b>0.560</b>  | (0.400–0.830) | <b>0.870</b>  | (0.660–1.20)  | 509          | 59.1                       |      |
|                     | 2001–2002    | *                                        | <LOD                                             |              | <LOD          |               | (0.440–0.800) | <b>0.610</b>  | <b>0.800</b>  | (0.670–0.970) | 767          | 20.9                       |      |
|                     | 2003–2004    | *                                        | <LOD                                             |              | <LOD          |               | <LOD          |               | <b>0.150</b>  | (<LOD–0.210)  | 648          | 7.33                       |      |
|                     | 1999–2000    | <b>0.080</b>                             | (0.057–0.111)                                    | <b>0.070</b> | (<LOD–0.110)  | <b>0.170</b>  | (0.110–0.280) | <b>0.450</b>  | (0.300–0.580) | <b>0.700</b>  | (0.500–1.02) | 509                        | 59.1 |
|                     | 2001–2002    | *                                        | <LOD                                             |              | <LOD          |               | (0.330–0.580) | <b>0.460</b>  | <b>0.720</b>  | (0.510–0.960) | 693          | 20.9                       |      |
|                     | 2003–2004    | *                                        | <LOD                                             |              | <LOD          |               | <LOD          |               | <b>0.270</b>  | (0.180–0.400) | 578          | 7.33                       |      |

<LOD means less than the limit of detection.

\* Not calculated. Proportion of results below limit of detection was too high to provide a valid result.

When examining the 2003–2004 data by multiple regression, the final model for DMTP included sex ( $p = 0.056$ ), age (continuous,  $p < 0.001$ ), age-square ( $p < 0.01$ ), race ( $p = 0.058$ ), and log creatinine ( $p < 0.0001$ ). We observed a curvilinear relationship between the log-transformed DMTP concentration and age (Figure 3). We found both a linear increase and positive quadratic trend with age ( $\beta$  for linear = 0.008,  $\beta$  for quadratic = 0.0005). In the model where age was treated categorically, the LSGM covariate-adjusted concentration of DMTP was highest among those ages 60 years and older (3.2  $\mu\text{g/L}$ ) while the second highest level was among children ages 6–11 years old (2.45  $\mu\text{g/L}$ ). NHB participants had the highest LSGM covariate-adjusted concentration of DMTP (3.57  $\mu\text{g/L}$ ), which was significantly higher than for NHW (1.97  $\mu\text{g/L}$ ,  $p = 0.02$ ). Similarly, NHB had a higher LSGM covariate-adjusted concentration than MA (1.94  $\mu\text{g/L}$ ,  $p = 0.02$ ). MA and NHW had similar LSGM covariate-adjusted concentrations for DMTP. The LSGM covariate-adjusted concentration of DMTP for females (2.46  $\mu\text{g/L}$ ) was marginally higher than the one for males ( $p = 0.055$ ).

**Figure 3.** A curvilinear relationship was observed between age and the least squares geometric mean (LSGM) dimethylthiophosphate concentrations.

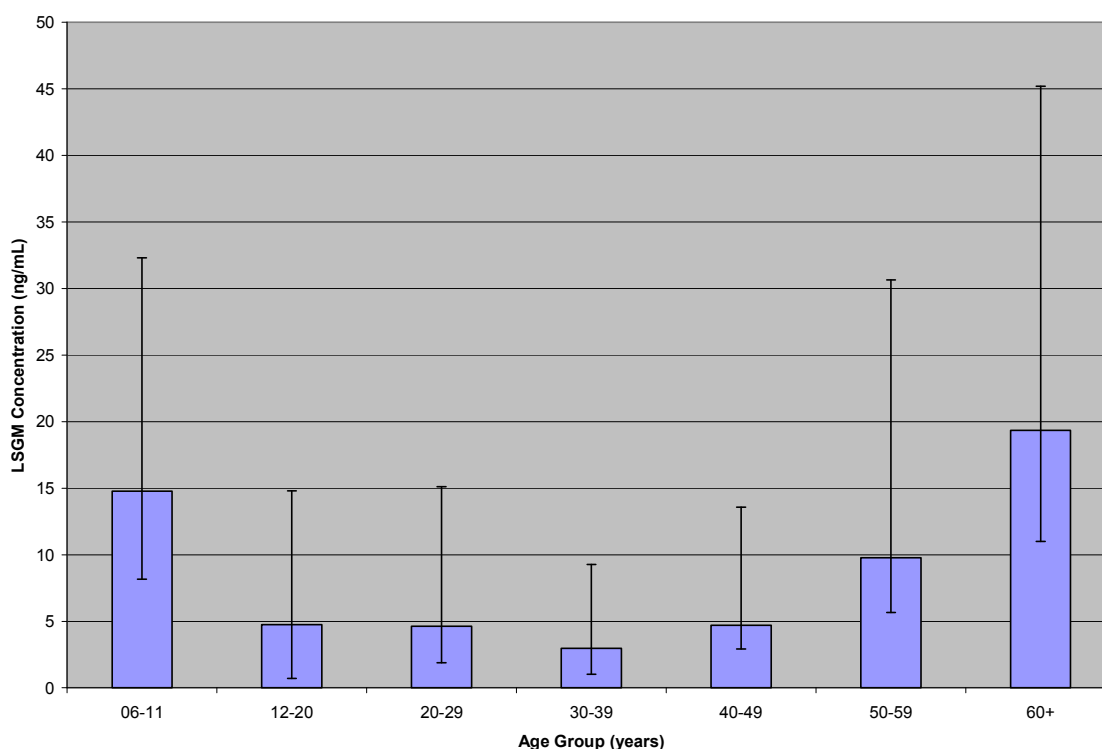

Regarding potential pathways of exposure, we noted that all analytes except DMP and DEDTP were significantly correlated with each other (Table 7). DMTP and DMDTP had the highest significant correlation ( $r = 0.59$ ), whereas the significant correlations between other analytes ranged from 0.06 to 0.39 (all  $p$ -values  $< 0.0001$ ).

**Table 7.** Spearman correlation coefficients between dialkylphosphate metabolites of organophosphorus pesticides (correlation, p value, number of observations).

|                                 | DMP   | DEP    | DMTP   | DETP   | DMDTP  | DEDTP  |
|---------------------------------|-------|--------|--------|--------|--------|--------|
| Dimethylphosphate (DMP)         | 1.000 | 0.325  | 0.391  | 0.221  | 0.282  | 0.029  |
|                                 |       | <.0001 | <.0001 | <.0001 | <.0001 | 0.1518 |
|                                 | 2,494 | 2,453  | 2,494  | 2,422  | 2,458  | 2,494  |
| Diethylphosphate (DEP)          |       | 1.000  | 0.165  | 0.317  | 0.135  | 0.101  |
|                                 |       |        | <.0001 | <.0001 | <.0001 | <.0001 |
|                                 |       | 2,453  | 2,453  | 2,381  | 2,417  | 2,453  |
| Dimethylthiophosphate (DMTP)    |       |        | 1.000  | 0.329  | 0.585  | 0.061  |
|                                 |       |        |        | <.0001 | <.0001 | 0.0023 |
|                                 |       |        | 2,494  | 2,422  | 2,458  | 2,494  |
| Diethylthiophosphate (DETP)     |       |        |        | 1.000  | 0.237  | 0.171  |
|                                 |       |        |        |        | <.0001 | <.0001 |
|                                 |       |        |        | 2,422  | 2,386  | 2,422  |
| Dimethyldithiophosphate (DMDTP) |       |        |        |        | 1.000  | 0.129  |
|                                 |       |        |        |        |        | <.0001 |
|                                 |       |        |        |        | 2,458  | 2,458  |
| Diethyldithiophosphate (DEDTP)  |       |        |        |        |        | 1.000  |
|                                 |       |        |        |        |        | 2,494  |

In examining the likelihood for those participants whose concentrations were above the 95th percentile, urine concentrations of DEP was significantly associated with age ( $p = 0.045$ ), but not sex and race/ethnicity. Adolescents were 2.96 and 2.4 times more likely to be above the total population 95th percentile than senior adults (60 and older) (odds ratio [OR] [95% CI]: 2.96 [1.7, 5.2]) and other adults (20–59 years old) (OR [95% CI]: 2.4 [1.1, 5.1]), respectively. Similarly, for DMDTP, age was significantly associated with the chance to be above the 95th percentile ( $p=0.05$ ). Participants aged 60 years and older were 3.8 times more likely to be above the 95th percentile than that for adolescents aged 12–19 years old (OR [95% CI]: 3.8 [1.2, 11.9]) and 1.8 times more likely than adults aged 20–59 years old (OR [95% CI]: 1.8 [1.02, 3.2]). Also, adults aged 20–59 years old were 2.1 times more likely than adolescents ages 12–19 years old to be above the 95th percentile (OR [95% CI]: 2.1 [1.0, 4.4]). No differences were found for the chance to be above the 95th percentile in any other age categories or for any other analytes.

During the three two-year NHANES cycles, the 75th, 90th, and 95th percentile estimates for DMDTP and DEDTP in 1999–2000 were 3 to 5 times higher than for the following two NHANES cycles in the total population. This observation was consistent across demographic groups. We also observed a reduction in DETP median concentrations in 2003–2004 from the 2001–2002 and 1999–2000 median estimates; however, upper distribution percentiles were similar with the ones in year 1999–2000 and appeared to be lower as compared to the ones in year 2001–2002.

DAP metabolites of OP pesticides have been measured in a random subset of three NHANES cycles since 1999. These data from 2001–2004 represent the first time reference DAP concentrations have been reported for adults >60 years old. Additionally, these are the first data reported on the sample sets

collected before and after a voluntary withdrawal of registrations for chlorpyrifos and diazinon. Although the DAP metabolite measurements are not specific for one OP pesticide in particular and a sizeable proportion probably derives from exposure to the preformed DAP metabolite in the environment, these data may be useful. They may serve as an indicator for the maximum potential of OP pesticide exposure over time.

Interestingly, the most vulnerable age groups, children and the elderly, had the highest concentrations of DMTP in 2003–2004, while adolescents and other adults had much lower levels. These data suggest that older adults and children share common behaviors or activities. For example, time spent indoors may contribute to their high urinary DAP concentrations. However, adolescents were more than twice as likely to have concentrations of DEP above the 95th percentile estimate than senior adults and adults. For DMDTP, senior adults were 3.8 times more likely to be above the 95th percentile than adolescents and 1.8 times more likely than adults. Also, adults were marginally more likely than adolescents to be above the 95th percentile. Understanding the predictors of exposure of the upper tail of the distribution is particularly important for regulatory mitigation efforts, so adolescents may be a good subpopulation to target for reducing exposure.

The significant correlation of all of the DAP metabolites in urine suggests common pathways for both exposure and excretion. Because the use of diethyl OP pesticides in applications with dimethyl pesticides is unexpected, the correlation among these likely points to dietary exposures from produce where both groups of OP pesticides were used regularly. The strongest correlation was between DMTP and DMDTP, both potential metabolites of the common OP pesticide malathion.

These data sets collectively suggest that human exposure to OP pesticides has decreased during the last six years. For example, the median and 95th percentile estimates of DMTP concentrations from NHANES 2003–2004 appeared to be one-third less than that found in NHANES 1999–2000 even though the frequency of detection only decreased by about 20%. Urinary concentrations of DETP were detected significantly less in samples collected in 2003–2004 than in those collected in 2001–2002; however, DEP concentrations were largely unaffected. Because DETP can be derived from chlorpyrifos and diazinon, strategies targeting residential pesticide use to reduce exposure may have contributed to the decrease. DEP is common to all diethyl-substituted OP insecticides which perhaps is why we may not have observed a similar decrease.

As noted earlier, the biggest limitation of our study is the lack of specificity of DAP metabolites for a given OP pesticide. According to some estimates, 70% or more of urinary OP metabolite concentrations may be attributable to exposure to the preformed metabolite in the environment, which is not known to be toxic [38–41]. Thus, we caution that the concentrations reported here be used as a maximum possible estimate of OP pesticide exposures. Regardless, reducing the use or tolerance levels of OP pesticides would also result in reduced preformed metabolite concentrations in the environment so that changes in urinary DAP concentrations over time may parallel exposure mitigation strategies demonstrating their effectiveness.

#### **4. Conclusions**

We reported data collected from three NHANES survey periods. Our data indicated that the most vulnerable segments of our population—children and senior adults—have a greater risk of exposure to



OP pesticides than other population segments. However, for DEP, adolescents were more than twice as likely to have concentrations greater than the 95th percentile compared with adults. For DMDTP, senior adults were 3.8 times more likely to be above the 95th percentile than adolescents and 1.8 times more likely than adults. Also, adults were marginally more likely than adolescents to be above the 95th percentile. In addition, NHB have higher DMTP concentrations than NHW and MA. Based on the DAP urinary metabolite data, overall exposures to OP pesticides have declined during the last few decades, suggesting that regulatory efforts have been effective.

### Acknowledgments

The findings and conclusions in this report are those of the authors and do not necessarily represent the views of the Centers for Disease Control and Prevention.

### References and Notes

1. Donaldson, D.; Kiely, T.; Grube, A. *1998–1999 Market Estimates*; U.S. Environmental Protection Agency: Washington, DC, USA, 2002.
2. *U.S. EPA Organophosphate Pesticide Tolerance Reassessment and Reregistration*; EPA: Washington, DC, USA, 2000; Available online: [www.epa.gov/pesticides/op](http://www.epa.gov/pesticides/op) (accessed on 16 May 2011).
3. Food Quality Protection Act of 1996. Public Law 104-170, 1996.
4. Whyatt, R.M.; Barr, D.B.; Camann, D.E.; Kinney, P.L.; Barr, J.R.; Andrews, H.F.; Hoepner, L.A.; Garfinkel, R.; Hazi, Y.; Reyes, A.; *et al.* Contemporary-use pesticides in personal air samples during pregnancy and blood samples at delivery among urban minority mothers and newborns. *Environ. Health Perspect.* **2003**, *111*, 749-756.
5. Azaroff, L.S. Biomarkers of exposure to organophosphorous insecticides among farmers' families in rural El Salvador: Factors associated with exposure. *Environ. Res.* **1999**, *80*, 138-147.
6. Hoppin, J.A.; Umbach, D.M.; London, S.J.; Alavanja, M.C.; Sandler, D.P. Chemical predictors of wheeze among farmer pesticide applicators in the Agricultural Health Study. *Am. J. Respir. Crit. Care Med.* **2002**, *165*, 683-689.
7. Husin, L.S.; Uttaman, A.; Hisham, H.J.; Hussain, I.H.; Jamil, M.R. The effect of pesticide on the activity of serum cholinesterase and current perception threshold on the paddy farmers in the Muda agricultural development area, MADA, Kedah, Malaysia. *Med. J. Malaysia* **1999**, *54*, 320-324.
8. Shealy, D.B.; Bonin, M.A.; Wooten, J.V.; Ashley, D.L.; Needham, L.L.; Bond, A.E. Application of an improved method for the analysis of pesticides and their metabolites in the urine of farmer applicators and their families. *Environ. Int.* **1996**, *22*, 661-675.
9. Curwin, B.D.; Hein, M.J.; Sanderson, W.T.; Barr, D.B.; Heederik, D.; Reynolds, S.J.; Ward, E.M.; Alavanja, M.C. Urinary and hand wipe pesticide levels among farmers and nonfarmers in Iowa. *J. Expo. Anal. Env. Epid.* **2005**, *15*, 500-508.
10. Curl, C.L.; Fenske, R.A.; Kissel, J.C.; Shirai, J.H.; Moate, T.F.; Griffith, W.; Coronado, G.; Thompson, B. Evaluation of take-home organophosphorus pesticide exposure among agricultural workers and their children. *Environ. Health Perspect.* **2002**, *110*, A787-792.

11. Fenske, R.A.; Kissel, J.C.; Lu, C.; Kalman, D.A.; Simcox, N.J.; Allen, E.H.; Keifer, M.C. Biologically based pesticide dose estimates for children in an agricultural community. *Environ. Health Perspect.* **2000**, *108*, 515-520.
12. Fenske, R.A.; Lu, C.; Simcox, N.J.; Loewenherz, C.; Touchstone, J.; Moate, T.F.; Allen, E.H.; Kissel, J.C. Strategies for assessing children's organophosphorus pesticide exposures in agricultural communities. *J. Expo. Anal. Environ. Epidemiol.* **2000**, *10*, 662-671.
13. Fenske, R.A. Pesticide exposure assessment of workers and their families. *Occup. Med.* **1997**, *12*, 221-237.
14. Heudorf, U.; Angerer, J. Metabolites of organophosphorous insecticides in urine specimens from inhabitants of a residential area. *Environ. Res.* **2001**, *86*, 80-87.
15. Barr, D.B.; Bravo, R.; Weerasekera, G.; Caltabiano, L.M.; Whitehead, R.D., Jr.; Olsson, A.O.; Caudill, S.P.; Schober, S.E.; Pirkle, J.L.; Sampson, E.J.; *et al.* Concentrations of dialkyl phosphate metabolites of organophosphorus pesticides in the U.S. population. *Environ. Health Perspect.* **2004**, *112*, 186-200.
16. Adgate, J.L.; Barr, D.B.; Clayton, C.A.; Eberly, L.E.; Freeman, N.C.; Liroy, P.J.; Needham, L.L.; Pellizzari, E.D.; Quackenboss, J.J.; Roy, A.; *et al.* Measurement of children's exposure to pesticides: Analysis of urinary metabolite levels in a probability-based sample. *Environ. Health Perspect* **2001**, *109*, 583-590.
17. Bradman, A.; Eskenazi, B.; Barr, D.B.; Bravo, R.; Castorina, R.; Chevrier, J.; Kogut, K.; Harnly, M.E.; McKone, T.E. Organophosphate urinary metabolite levels during pregnancy and after delivery in women living in an agricultural community. *Environ. Health Perspect.* **2005**, *113*, 1802-1807.
18. Castorina, R.; Bradman, A.; McKone, T.E.; Barr, D.B.; Harnly, M.E.; Eskenazi, B. Cumulative organophosphate pesticide exposure and risk assessment among pregnant women living in an agricultural community: A case study from the CHAMACOS cohort. *Environ. Health Perspect.* **2003**, *111*, 1640-1648.
19. Eskenazi, B.; Harley, K.; Bradman, A.; Weltzien, E.; Jewell, N.P.; Barr, D.B.; Furlong, C.E.; Holland, N.T. Association of in utero organophosphate pesticide exposure and fetal growth and length of gestation in an agricultural population. *Environ. Health Perspect.* **2004**, *112*, 1116-1124.
20. Young, J.G.; Eskenazi, B.; Gladstone, E.A.; Bradman, A.; Pedersen, L.; Johnson, C.; Barr, D.B.; Furlong, C.E.; Holland, N.T. Association between in utero organophosphate pesticide exposure and abnormal reflexes in neonates. *Neurotoxicology* **2005**, *26*, 199-209.
21. Whyatt, R.M.; Rauh, V.; Barr, D.B.; Camann, D.E.; Andrews, H.F.; Garfinkel, R.; Hoepner, L.A.; Diaz, D.; Dietrich, J.; Reyes, A.; *et al.* Prenatal insecticide exposures and birth weight and length among an urban minority cohort. *Environ. Health Perspect.* **2004**, *112*, 1125-1132.
22. Barr, D.B.; Allen, R.; Olsson, A.O.; Bravo, R.; Caltabiano, L.M.; Montesano, A.; Nguyen, J.; Udunka, S.; Walden, D.; Walker, R.D.; *et al.* Concentrations of selective metabolites of organophosphorus pesticides in the United States population. *Environ. Res.* **2005**, *99*, 314-326.
23. Fenske, R.A.; Lu, C.; Barr, D.; Needham, L. Children's exposure to chlorpyrifos and parathion in an agricultural community in central Washington State. *Environ. Health Perspect.* **2002**, *110*, 549-553.

24. Koch, H.M.; Angerer, J. Analysis of 3,5,6-trichloro-2-pyridinol in urine samples from the general population using gas chromatography-mass spectrometry after steam distillation and solid-phase extraction. *J. Chromatogr. B Biomed. Sci. Appl.* **2001**, *759*, 43-49.
25. Koch, H.M.; Hardt, J.; Angerer, J. Biological monitoring of exposure of the general population to the organophosphorus pesticides chlorpyrifos and chlorpyrifos-methyl by determination of their specific metabolite 3,5,6-trichloro-2-pyridinol. *Int. J. Hyg. Environ. Health* **2001**, *204*, 175-180.
26. Aprea, C.; Sciarra, G.; Orsi, D.; Boccalon, P.; Sartorelli, P.; Sartorelli, E. Urinary excretion of alkylphosphates in the general population (Italy). *Sci. Total Environ.* **1996**, *177*, 37-41.
27. Loewenherz, C.; Fenske, R.A.; Simcox, N.J.; Bellamy, G.; Kalman, D. Biological monitoring of organophosphorus pesticide exposure among children of agricultural workers in central Washington State. *Environ. Health Perspect.* **1997**, *105*, 1344-1353.
28. Lu, C.; Knutson, D.E.; Fisker-Andersen, J.; Fenske, R.A. Biological monitoring survey of organophosphorus pesticide exposure among pre-school children in the Seattle metropolitan area. *Environ. Health Perspect.* **2001**, *109*, 299-303.
29. Mills, P.K.; Zahm, S.H. Organophosphate pesticide residues in urine of farmworkers and their children in Fresno County, California. *Am. J. Ind. Med.* **2001**, *40*, 571-577.
30. Whyatt, R.M.; Barr, D.B. Measurement of organophosphate metabolites in postpartum meconium as a potential biomarker of prenatal exposure: A validation study. *Environ. Health Perspect.* **2001**, *109*, 417-420.
31. *CDC National Health and Nutrition Examination Survey*; CDC/NCHS: Hyattsville, MD, USA, 2011; Available online: <http://www.cdc.gov/nchs/nhanes.htm> (accessed on 16 May 2011).
32. Jaffe, M. Ueber den niederschlag welchen pikrinsaure in normalen harn erzeugt und uber eine neue reaction des kreatinins. *Z. Physio. Chem.* **1886**, *10*, 391-400.
33. Bravo, R.; Driskell, W.J.; Whitehead, R.D., Jr.; Needham, L.L.; Barr, D.B. Quantitation of dialkyl phosphate metabolites of organophosphate pesticides in human urine using GC-MS-MS with isotopic internal standards. *J. Anal. Toxicol.* **2002**, *26*, 245-252.
34. Bravo, R.; Calabiano, L.M.; Weerasekera, G.; Whitehead, R.D.; Fernandez, C.; Needham, L.L.; Bradman, A.; Barr, D.B. Measurement of dialkyl phosphate metabolites of organophosphorus pesticides in human urine using lyophilization with gas chromatography-tandem mass spectrometry and isotope dilution quantification. *J. Expo. Anal. Environ. Epidemiol.* **2004**, *14*, 249-259.
35. Clinical Laboratory Improvement Amendment of 1988. Public Law 57 FR 7139, 1988.
36. Hornung, R.W.; Reed, L. Estimation of average concentration in the presence of nondetectable values. *Appl. Occup. Environ. Hyg.* **1990**, *5*, 46-51.
37. Techniques for imputing values below the LOD have been debated in the literature. We used the imputation technique consistent with CDC's National Report on Human Exposure to Environmental Chemicals. Other imputation techniques may produce slightly different estimates.
38. Morgan, M.K.; Sheldon, L.S.; Croghan, C.W.; Jones, P.A.; Robertson, G.L.; Chuang, J.C.; Wilson, N.K.; Lyu, C.W. Exposures of preschool children to chlorpyrifos and its degradation product 3,5,6-trichloro-2-pyridinol in their everyday environments. *J. Expo. Anal. Environ. Epidemiol.* **2005**, *15*, 297-309.

39. Wilson, N.K.; Chuang, J.C.; Lyu, C.; Menton, R.; Morgan, M.K. Aggregate exposures of nine preschool children to persistent organic pollutants at day care and at home. *J. Expo. Anal. Environ. Epidemiol.* **2003**, *13*, 187-202.
40. Krieger, R.I.; Dinoff, T.M.; Williams, R.L.; Zhang, X.; Ross, J.H.; Aston, L.S.; Myers, G. Correspondence: Preformed biomarkers in produce inflate human organophosphate exposure assessments. *Environ. Health Perspect.* **2003**, *111*, A688-689; Author reply A689-691.
41. Lu, C.; Bravo, R.; Calabiano, L.M.; Irish, R.M.; Weerasekera, G.; Barr, D.B. The presence of dialkylphosphates in fresh fruit juices: Implication for organophosphorus pesticide exposure and risk assessments. *J. Toxicol. Environ. Health A* **2005**, *68*, 209-227.

© 2011 by the authors; licensee MDPI, Basel, Switzerland. This article is an open access article distributed under the terms and conditions of the Creative Commons Attribution license (<http://creativecommons.org/licenses/by/3.0/>).
